# Supplementary material
Source: PubMed Central journal article supplement (PMC6275523)
Supplement: pnas.1812135115.sapp.pdf [file pnas.1812135115.sapp.pdf]

1

## 2 **Supplementary Information for**

### 3 **Polygenic adaptation and convergent evolution on growth and cardiac genetic pathways in** 4 **African and Asian rainforest hunter-gatherers**

5 **C. M. Bergey, M. Lopez, G. F. Harrison, E. Patin, J. A. Cohen, L. Quintana-Murci, L. B. Barreiro, and G. H. Perry**

6 **Corresponding Authors: Christina M. Bergey and George H. Perry.**

7 **E-mail: [cxb585@psu.edu](mailto:cxb585@psu.edu) and [ghp3@psu.edu](mailto:ghp3@psu.edu)**

#### 8 **This PDF file includes:**

- 9     Supplementary text
- 10    Figs. S1 to S12
- 11    Tables S1 to S22
- 12    Captions for Databases S1 to S15
- 13    References for SI reference citations

#### 14 **Other supplementary materials for this manuscript include the following:**

- 15     Databases S1 to S15

## 16 Supporting Information Text

### 17 Text S1 - Positive selection signatures on growth-associated genes

18 We examined whether gene-specific signatures of strong positive selection (using an “outlier-based” designation of genes with  
19 PBS index values  $< 0.01$ ) in the rainforest populations were enriched for known functional associations with growth using *a*  
20 *priori* lists of 4,888 total growth-related genes, consisting of (with some redundancy among individual categories, as expected):  
21 i) 3,996 genes that affect growth or size in mice (MP:0005378) from the Mouse/Human Orthology with Phenotype Annotations  
22 database (1); ii) 266 genes associated with abnormal skeletal growth syndromes in the Online Mendelian Inheritance in Man  
23 (OMIM) database (<https://omim.org/>), as assembled by (2); iii) 427 genes expressed substantially more highly in the mouse  
24 growth plate, the cartilaginous region on the end of long bones where bone elongation occurs, than in soft tissues (lung, kidney,  
25 heart;  $\geq 2.0$  fold change; (3); and iv) 955 genes annotated with the Gene Ontology “growth” biological process (GO:0040007).  
26 Separately, we also considered in our analyses the set of 166 genes located within the 16 genomic regions previously associated  
27 with the pygmy phenotype in the Batwa, using an admixture mapping approach (4), as well as GH1- and IGF1-associated  
28 genes using data from OPHID database of protein–protein interaction (PPI) networks (5).

29 We used each of the curated *a priori* growth-related gene lists for testing the hypothesis that such loci are enriched for  
30 genes with signatures of strong positive selection (outlier PBS selection index values) or have a shift in the distribution of PBS  
31 selection index values consistent with subtle polygenic adaptation in the Batwa and Andamanese rainforest hunter-gatherer but  
32 not the Bakiga and Brahmin agriculturalist populations. We identified 202, 188, 291, and 252 outlier strong selection candidate  
33 genes (with PBS index values  $< 0.01$ ) in each of the Batwa, Bakiga, Andamanese, and Brahmin populations, respectively.  
34 Genes in the *a priori* growth-related gene lists were not significantly overrepresented among PBS outliers in any populations,  
35 except for those associated with mouse growth phenotype in the Brahmin (68 observed, 47.7 expected; Fisher  $p = 0.0179$ )  
36 (Dataset S1i). Though the lack of over-representation of growth-related gene lists among loci with outlier signatures of strong  
37 positive natural selection related to growth is perhaps unsurprising considering the polygenic phenotype, our distribution  
38 shift-based test also showed no significant shifts in the distribution of PBS indices for any population (Dataset S1k). Genes in  
39 genomic regions previously associated with the pygmy phenotype in the Batwa (4) were enriched for genes with outlier PBS  
40 selection index values in the Batwa (outlier-based test: 5 observed, 1.39 expected; Fisher  $p = 0.017$ ; Dataset S1i) and the PBS  
41 distribution for the phenotype-associated genes was shifted relative to the genome-wide distribution (distribution shift-based  
42 test: Kolmogorov-Smirnov test  $p = 0.056$ ; Dataset S1k). We found no evidence that genes associated with GH1 and IGF1 were  
43 enriched for outlier or polygenic selection.

### 44 Text S2 - Impact of cross-annotated genes between growth factor- and cardiac-related pathways

45 To assess whether shared genes in GO categories relating to the heart and growth factor binding were responsible for the  
46 significant shift in PBS selection index values for genes in these annotations, we compared the distributions of PBS selection  
47 indices before and after removing 9 genes common to heart pathways and growth factor binding. The heart GO terms  
48 assessed were: ‘cardiocyte differentiation’ (GO:0035051), with a shift in the Andamanese hunter-gatherers; ‘cardiac ventricle  
49 development’ (GO:0003231), with a shift in the Batwa hunter-gatherers; and ‘cardiac muscle tissue development’ (GO:0048738)  
50 with a convergent shift in the Batwa and Andamanese. Of the 123 heart related genes contained in these pathways, 9 were also  
51 annotated to the GO molecular function ‘growth factor binding’ (GO:0019838): *ACVR1*, *EGFR*, *ENG*, *FGFR2*, *FGFRL1*,  
52 *LTBP1*, *SCN5A*, *TGFBR1*, and *TGFBR3*.

53 After removing the 9 shared genes, the mean PBS selection index for the Andamanese among genes annotated to ‘cardiocyte  
54 differentiation’ decreased slightly from 0.444 to 0.443 and the pre- and post-filtration distributions were not significantly  
55 different (Kolmogorov-Smirnov  $D = 0.023$ ,  $p = 1$ ). Similarly, the mean PBS selection index for the Batwa for genes in ‘cardiac  
56 ventricle development’ decreased slightly from 0.654 to 0.652, and the distributions were not significantly different ( $D = 0.044$ ,  
57  $p = 1$ ). Finally, for ‘cardiac muscle tissue development’, the mean PBS selection index for the Andamanese increased from 0.450  
58 to 0.453, and for the Batwa increased from 0.474 to 0.486. Again the pre- and post-filtering distributions were not significantly  
59 different for the Andamanese ( $D = 0.015$ ,  $p = 1$ ) or Batwa ( $D = 0.015$ ,  $p = 1$ ).

60 Similarly, after removing 9 shared genes, the mean PBS selection index for genes annotated to ‘growth factor binding’  
61 (GO:0019838) for the Batwa increased slightly from 0.437 to 0.440 and for the Andamanese decreased from 0.455 to 0.437.  
62 Again, the pairs of distributions were not significantly different (Batwa:  $D = 0.030$ ,  $p = 1$ ; Andamanese:  $D = 0.036$ ,  $p = 1$ ).

### 63 Text S3 - Correcting for potential bias from differing gene size or global minor allele frequency (MAF)

64 In order to assess the potential biases related to differences in gene length (e.g. number of SNPs) or in SNP global minor  
65 allele frequencies (MAF), we repeated the analysis after modifying how the PBS selection index was computed. As in the  
66 uncorrected analysis, these corrected PBS selection index values were computed using 1,000 iterations.

67 First, to control for gene size, we sampled the PBS values for each SNP from only genes with the same number of SNPs  
68 during the computation of the selection index. For larger genes, gene sizes were binned to ensure sufficient SNPs from which to  
69 sample, using sets [11, 15], [16, 20], and [21,  $\infty$ ).

70 Second, to control for differing MAF values for SNPs, we did the permutation-based computation of the PBS selection index  
71 while matching SNPs on global MAF (computed using the African or Asian datasets for within-continent analyses.) SNPs were  
72 grouped by MAF into bins of size 0.01, and for each SNP in a gene, SNPs were sampled from only the set in the MAF bin.

73 Neither modification to the PBS selection index computation algorithm majorly affected the PBS selection index values nor  
74 the GO-based downstream analyses. Corrected and uncorrected PBS selection index values were highly correlated ( $R^2 = 0.993$   
75 to 0.997 and 0.953 to 0.985 for the gene size- and MAF-corrections respectively; SI Appendix, Fig. S4).

76 The GO biological processes and molecular functions with the strongest evidence of enrichment for strong selection were  
77 similar for the convergent (SI Appendix, Tables S5 and S6, Figs. S5 and S6) and population-specific selection analyses (SI  
78 Appendix, Tables S9 and S10, Figs. S5 and S6). The only mentioned growth- or heart-associated pathway that was no longer  
79 significant after correction was the biological process “negative regulation of growth,” which was significantly enriched for genes  
80 with evidence of strong selection in the Batwa in the original analysis, but its p-value rose to 0.0448 after correction for gene  
81 size. In contrast, “cardiac muscle tissue development” (GO:0048738) which originally had a convergent empirical p-value of  
82 0.025, was significantly enriched for strong positive selection convergently in the Batwa and Andamanese after MAF-based  
83 filtration ( $p = 0.001$ ).

84 Similarly, the top GO categories with evidence of polygenic selection were largely unchanged for the convergent (SI Appendix,  
85 Tables S13 and S14, Figs. S9 and S10) and population-specific selection analyses (SI Appendix, Tables S17 and S18, Figs.  
86 S9 and S10). Minor changes include “growth factor binding” (GO:0019838) which rose to be no longer significant with the  
87 MAF-based correction (original convergent empirical  $p < 0.001$ ; MAF corrected  $p = 0.005$ ).

#### 88 **Text S4 - Modification of significance testing in empirical test for convergent evolution**

89 We also modified and repeated the analysis that computes the significance of the convergence GO tests using a permutation-  
90 based approach. Whereas we originally permuted gene-PBS relationships to generate the random null distributions of PBS  
91 selection index values for two populations considered jointly, we instead permuted the gene-GO relationships to preserve LD  
92 patterns. The one-to-many relationships between genes and GO terms were shuffled, maintaining the groupings of GO terms  
93 that were assigned together to an original gene. We repeated the GO-based analyses for enrichment of strong selection or  
94 polygenic selection 1,000 times with these randomized gene-GO annotations, and compared our actual observed values to this  
95 randomly-generated null distribution. As before, we then defined the p-value of our empirical test for convergent evolution as  
96 the probability that this statistic was more extreme (lower) for the observed values than for the randomly generated values.  
97 The resultant p-value summarizes the test of the null hypothesis that both results could have been jointly generated under  
98 random chance. The results of the modified test were only slightly different than the original for both convergence in strong  
99 outlier selection (SI Appendix, Table S21) and in a shifted PBS selection index (SI Appendix, Table S22).

#### 100 **Text S5 - Assessment of bias due to uncertainty in allele frequency**

101 Given the differing samples sizes available for each population, we performed a simple analysis to determine how allele frequency  
102 uncertainty could have affected our results. First, we subsampled the larger Batwa and Bakiga populations down to random  
103 sets of no more than 30 individuals (the size of the British and Kenyan outgroup populations), recomputed  $F_{ST}$  and PBS, and  
104 performed the gene ontology-based tests with this modified input. The analyses based on the subsampled populations did  
105 appear to have slightly lower power to detect signatures of selection based on relatively higher p-values of the most significant  
106 results compared to the analysis of our full sample. However, our main results typically remained among the top enriched GO  
107 terms for each analysis. Specifically:

- 108 • As in the full analysis, the set of GO terms with evidence of significant convergent enrichment for strong positive selection  
109 included GO biological processes related to limb morphogenesis including ‘embryonic limb morphogenesis’ (empirical test  
110 for convergence  $p < 0.001$ ; SI Appendix, Fig. S7, Table S7).
- 111 • The two highlighted growth-related GO terms remained among the set of terms with significant population-specific  
112 enrichment for strong positive selection (SI Appendix, Fig. S7, Table S11): ‘negative regulation of growth’ was significantly  
113 enriched for the Batwa ( $p = 0.005$ ) and ‘negative regulation of cell differentiation’ for the Andamanese ( $p = 0.0045$ ).
- 114 • As in the full analysis, the GO terms with significant evidence of convergent shifts in PBS select index values included  
115 ‘growth factor binding’ (empirical test for convergence  $p = 0.003$ ), but ‘organ growth’ and ‘cardiac muscle tissue  
116 development’ were no longer significant (SI Appendix, Fig. S11, Table S15).
- 117 • Finally, the GO terms with significant population-specific shifts in distribution of PBS selection index again included the  
118 heart-related terms ‘cardiac ventricle development’ for the Batwa ( $p = 0.001$ ) and ‘cardiocyte differentiation’ for the  
119 Andamanese ( $p = 0.009$ ), though related term ‘cardiac muscle tissue development’ was not significant (SI Appendix, Fig.  
120 S11, Table S19).

121 We also performed a second subsampling analysis because our populations with the smallest sample sizes, the Andamanese  
122 and Brahmin, were represented by 10 individuals per population. We repeated all of our analyses after randomly subsampling  
123 each of the Batwa and Bakiga populations down to 10 from 50 individuals. We again observed growth- and heart-related  
124 genetic pathways to be the most enriched for signatures of selection, consistent with the original analysis:

- 125 • GO biological processes related to limb morphogenesis remained among the set of GO terms with evidence of convergent  
126 enrichment for strong positive selection, including ‘embryonic limb morphogenesis’ (empirical test for convergence  
127  $p < 0.001$ ; SI Appendix, Fig. S8, Table S8).

- 128 • For population-specific enrichment for strong positive selection, ‘negative regulation of growth’ was not significantly  
 129 enriched for the Batwa (SI Appendix, Fig. S8, Table S12), unlike in the full analysis. The growth-related GO term,  
 130 ‘negative regulation of cell differentiation,’ remained significantly enriched for the Andamanese ( $p = 0.004$ ).
- 131 • The GO terms with significant evidence of convergent shifts in PBS select index values included ‘growth factor binding’  
 132 ( $p = 0.003$ ), ‘organ growth’ ( $p = 0.002$ ), and ‘cardiac muscle tissue development’ ( $p = 0.003$ ), as in the full analysis. A  
 133 related term, ‘heart morphogenesis,’ was also significantly enriched ( $p = 0.002$ ; SI Appendix, Fig. S12, Table S16).
- 134 • Finally, as before, the terms with significant population-specific shifts in distribution of PBS selection index included the  
 135 heart-related terms ‘cardiac ventricle development’ for the Batwa ( $p = 0.003$ ) and ‘cardiocyte differentiation’ for the  
 136 Andamanese ( $p = 0.010$ ), though related term ‘cardiac muscle tissue development’ was not significant (SI Appendix, Fig.  
 137 S12, Table S20).

Fig. S1: Population Branch Statistic (PBS) schematic.

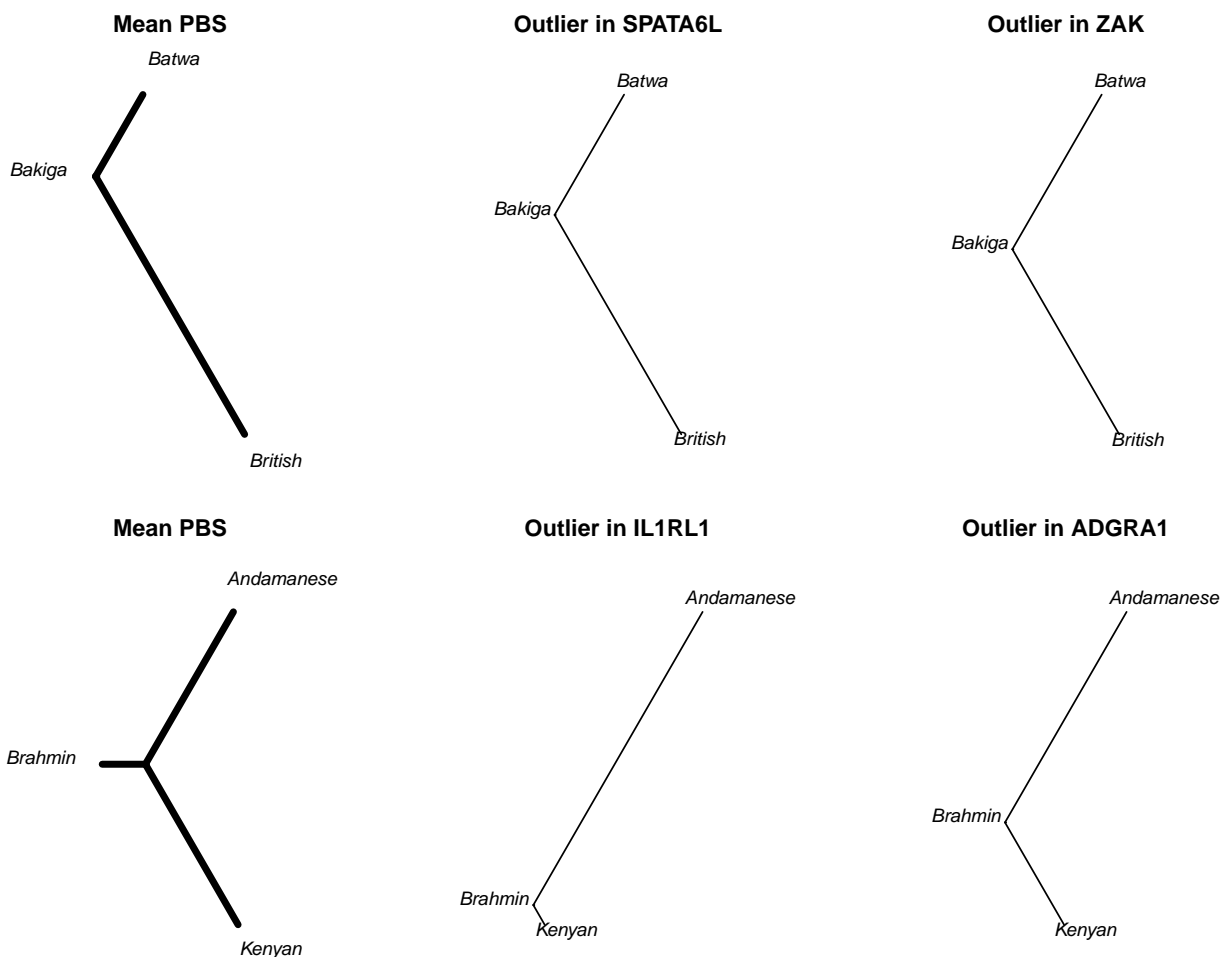

Fig. S1. Mean values of the Population Branch Statistic (PBS; left) for the African dataset (Batwa, Bakiga, and outgroup British populations; upper row) and Asian dataset (Andamanese, Brahmin, and outgroup Kenyan populations; lower row). Middle and right columns contain PBS values for two outlier SNPs in each population.

Fig. S2: Population Branch Statistic (PBS) by SNP.

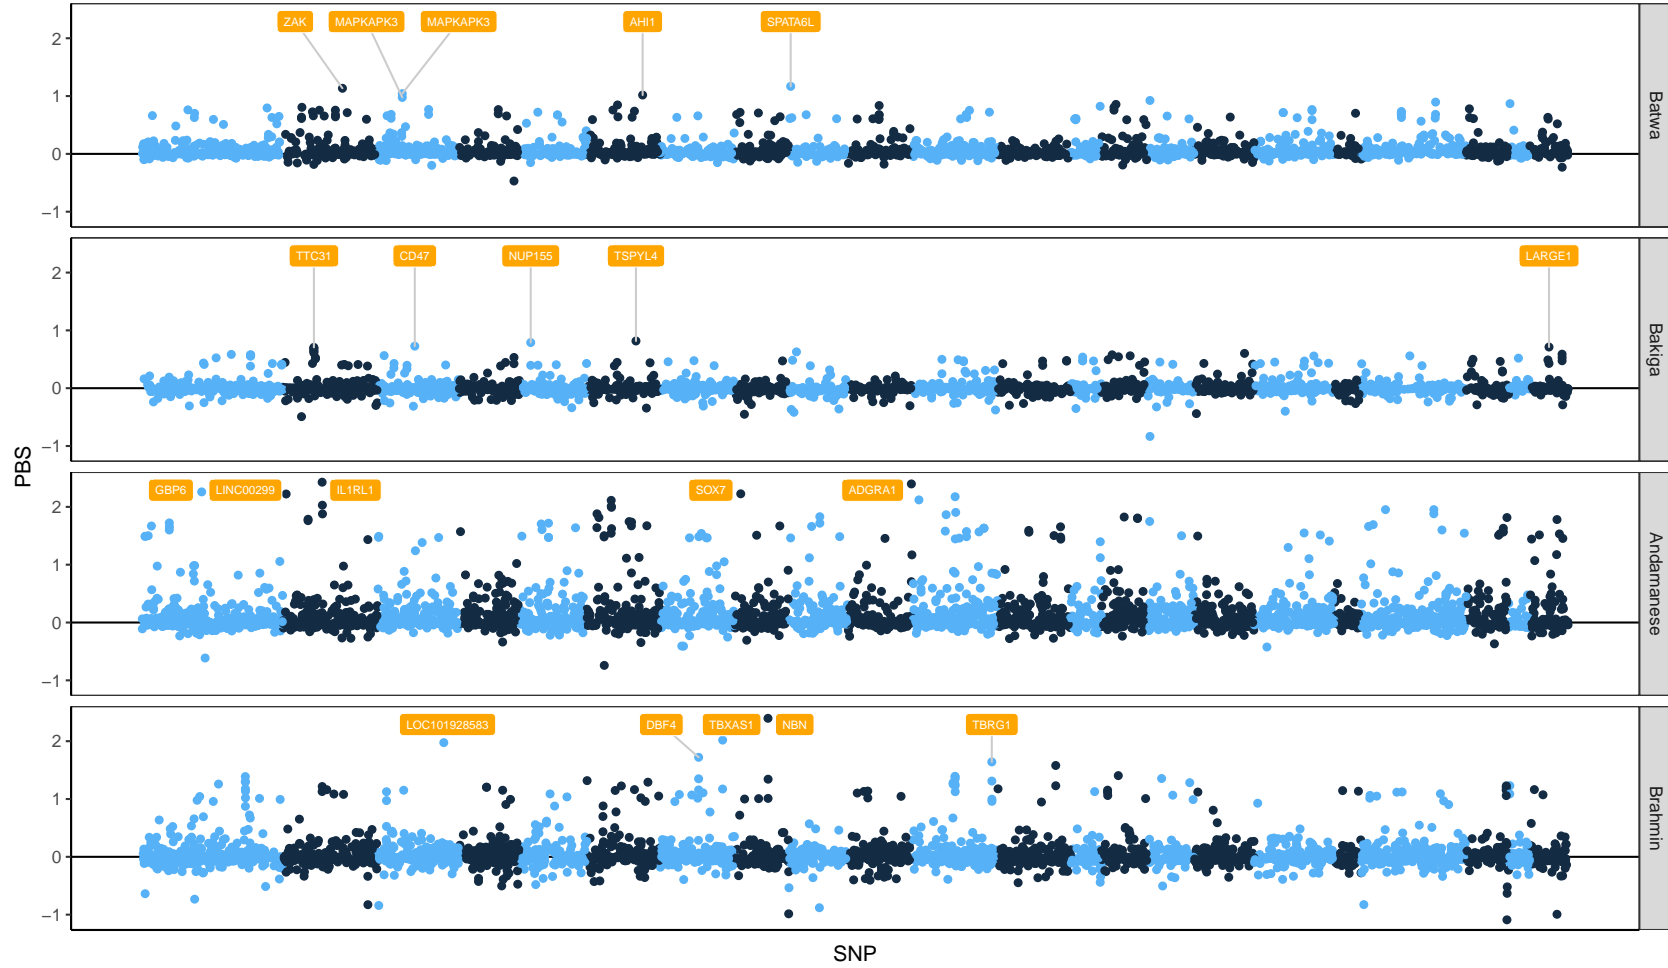

Fig. S2. Population Branch Statistic (PBS) values plotted across the genome for the four focal populations. The genes containing the SNPs with the 5 highest PBS values in each population are labeled.

Fig. S3: Population Branch Statistic (PBS) by gene SNP count.

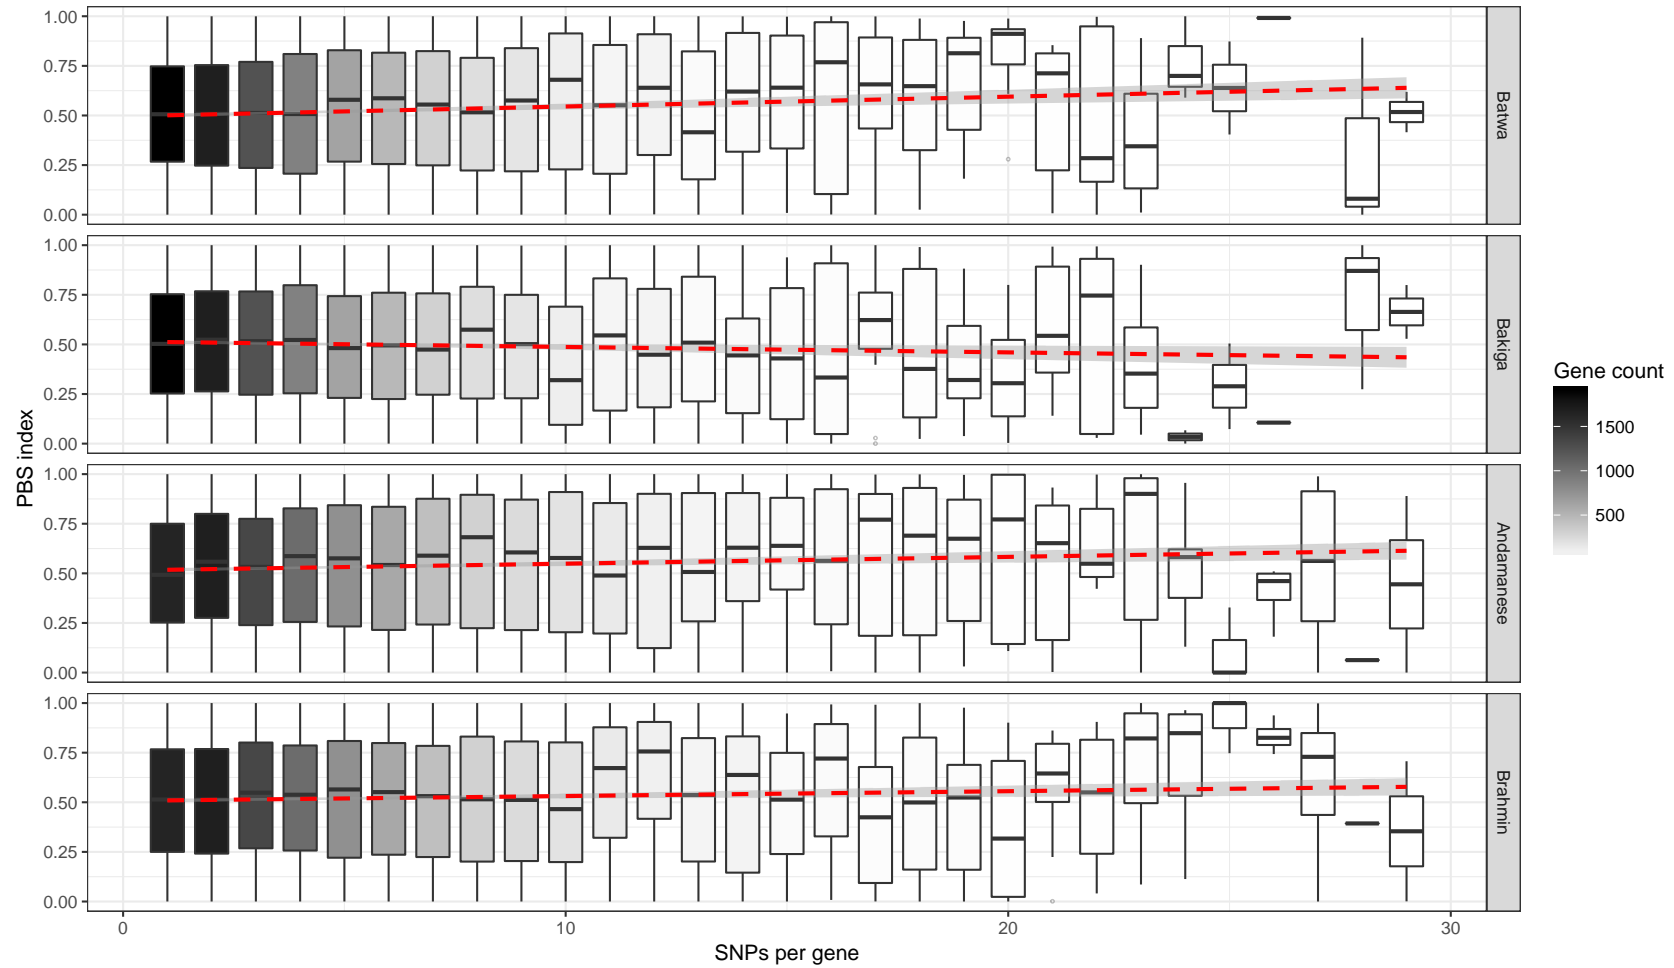

Fig. S3. Population Branch Statistic (PBS) selection index values plotted by number of SNPs in gene. Color indicates number of genes with that SNP count. Only SNP counts from 1 to 30 shown.

Fig. S4: Gene size- and MAF-based corrections' impact on p-value.

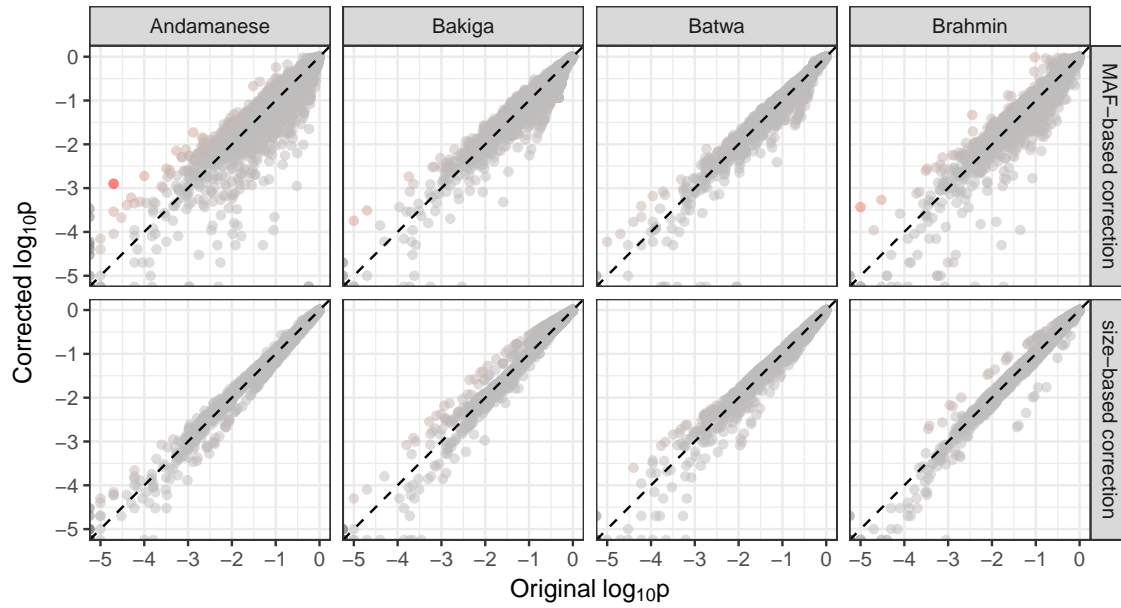

Fig. S4. Plots of PBS selection index values for genes corrected for gene size and MAF shown compared to the original uncorrected values (with both plotted on a logarithmic scale. Red shading indicates higher percent difference from original value.

Fig. S5: Gene size-corrected strong positive selection enrichment results.

A. Rainforest hunter-gatherers

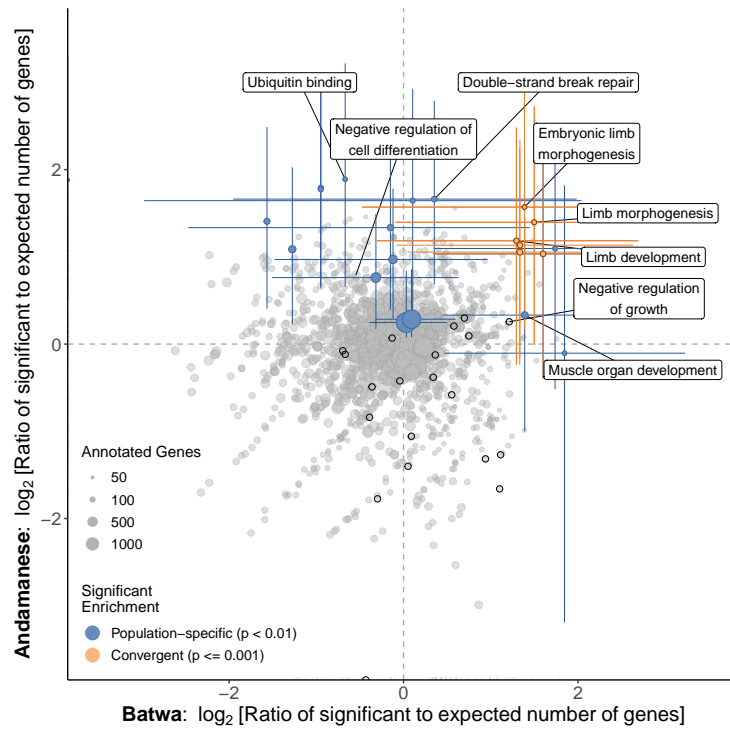

B. Agriculturalists

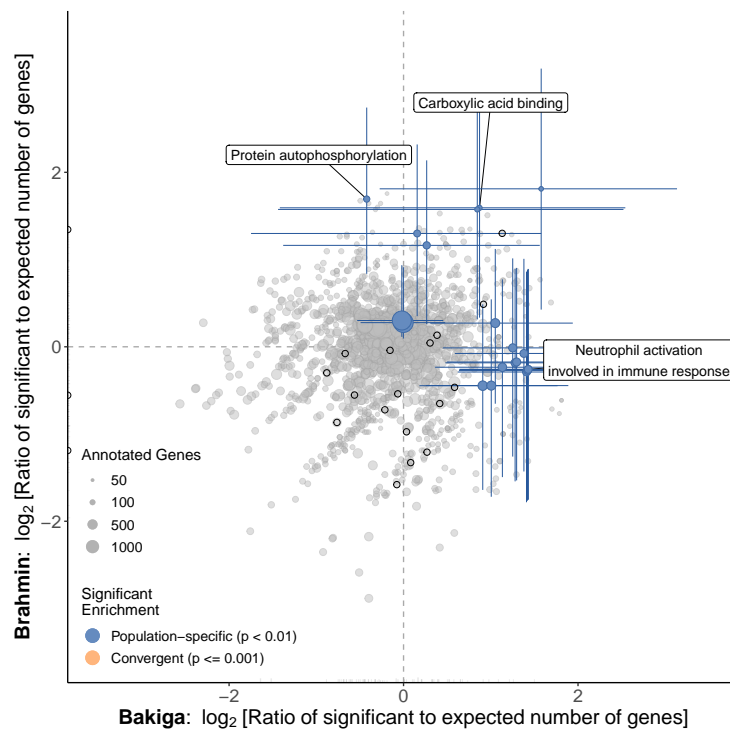

Fig. S5. After gene size-based correction, Gene Ontology (GO) functional categories' ratios of expected to observed counts of outlier genes (with PBS selection index < 0.01) in the Batwa and Andamanese rainforest hunter-gatherers (A) and Bakiga and Brahmin agriculturalist control (B). Results shown for GO biological processes and molecular functions. Point size is scaled to number of annotated genes in category. Terms that are significantly overrepresented for genes under positive selection (Fisher  $p < 0.01$ ) in either population shown in blue and for both populations convergently (empirical permutation-based  $p < 0.005$ ) shown in orange. Colored lines represent 95% CI for significant categories estimated by bootstrapping genes within pathways. Black outlines indicate growth-associated terms: the 'growth' biological process (GO:0040007) and its descendant terms, or the molecular functions 'growth factor binding,' 'growth factor receptor binding,' 'growth hormone receptor activity,' and 'growth factor activity' and their sub-categories.



**Fig. S6: MAF-corrected strong positive selection enrichment results.**

**A. Rainforest hunter-gatherers**

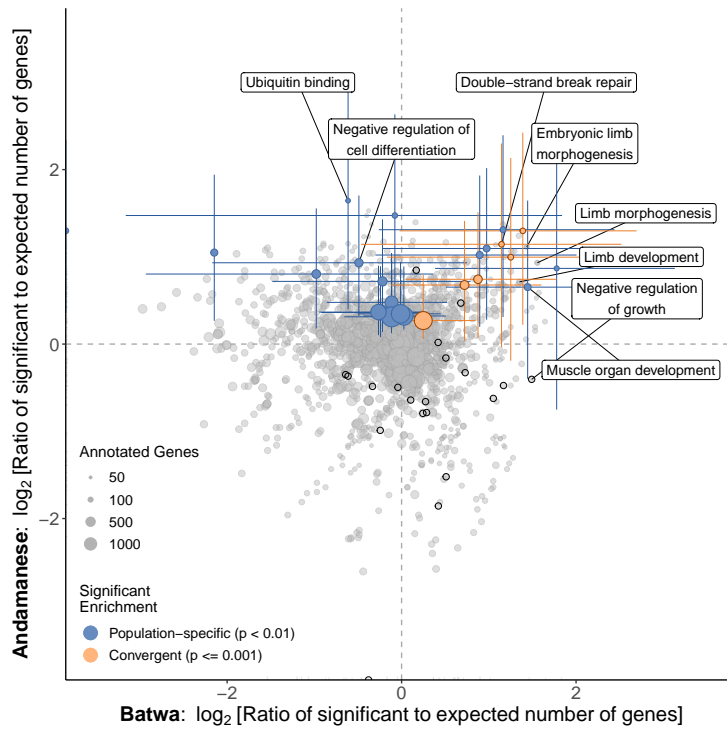

**B. Agriculturalists**

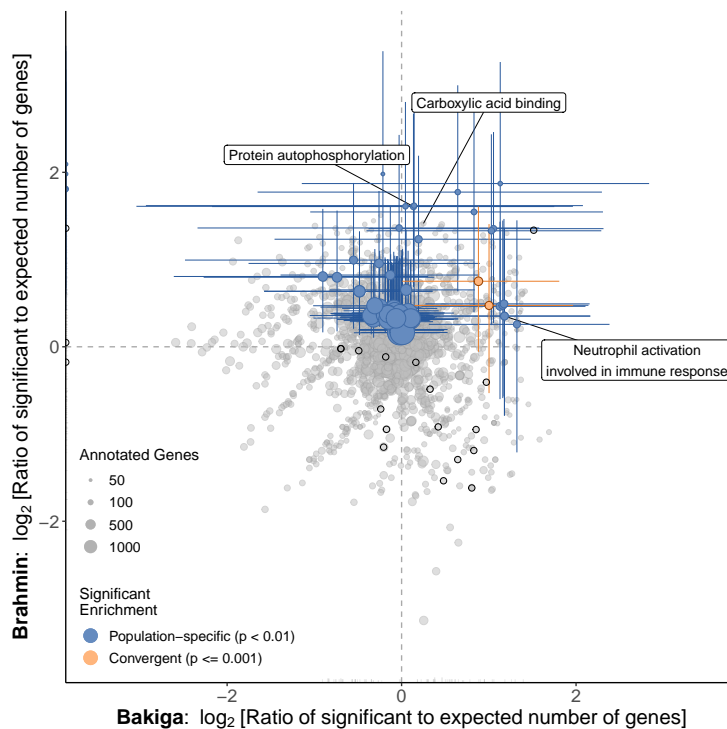

**Fig. S6.** After MAF-based correction, Gene Ontology (GO) functional categories' ratios of expected to observed counts of outlier genes (with PBS selection index < 0.01) in the Batwa and Andamanese rainforest hunter-gatherers (A) and Bakiga and Brahmin agriculturalist control (B). Results shown for GO biological processes and molecular functions. Point size is scaled to number of annotated genes in category. Terms that are significantly overrepresented for genes under positive selection (Fisher  $p < 0.01$ ) in either population shown in blue and for both populations convergently (empirical permutation-based  $p < 0.005$ ) shown in orange. Colored lines represent 95% CI for significant categories estimated by bootstrapping genes within pathways. Black outlines indicate growth-associated terms: the 'growth' biological process (GO:0040007) and its descendant terms, or the molecular functions 'growth factor binding,' 'growth factor receptor binding,' 'growth hormone receptor activity,' and 'growth factor activity' and their sub-categories.

Fig. S7: Strong positive selection enrichment results after subsampling to  $\leq 30$  individuals per population.

A. Rainforest hunter-gatherers

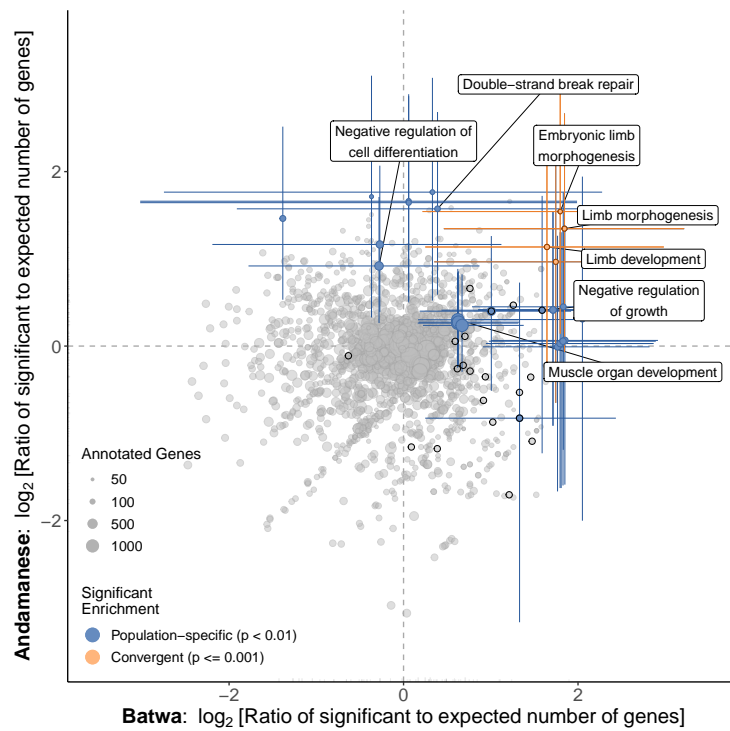

B. Agriculturalists

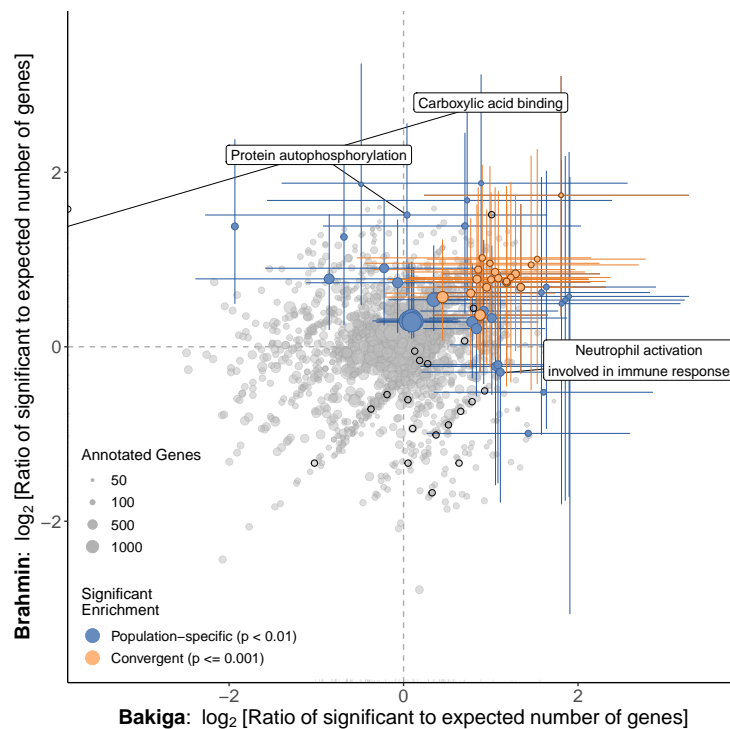

Fig. S7. After subsampling to  $\leq 30$  individuals per population, Gene Ontology (GO) functional categories' ratios of expected to observed counts of outlier genes (with PBS selection index  $< 0.01$ ) in the Batwa and Andamanese rainforest hunter-gatherers (A) and Bakiga and Brahmin agriculturalist control (B). Results shown for GO biological processes and molecular functions. Point size is scaled to number of annotated genes in category. Terms that are significantly overrepresented for genes under positive selection (Fisher  $p < 0.01$ ) in either population shown in blue and for both populations convergently (empirical permutation-based  $p < 0.005$ ) shown in orange. Colored lines represent 95% CI for significant categories estimated by bootstrapping genes within pathways. Black outlines indicate growth-associated terms: the 'growth' biological process (GO:0040007) and its descendant terms, or the molecular functions 'growth factor binding,' 'growth factor receptor binding,' 'growth hormone receptor activity,' and 'growth factor activity' and their sub-categories.

**Fig. S8: Strong positive selection enrichment results after subsampling Batwa and Bakiga to 10 individuals per population.**

**A. Rainforest hunter-gatherers**

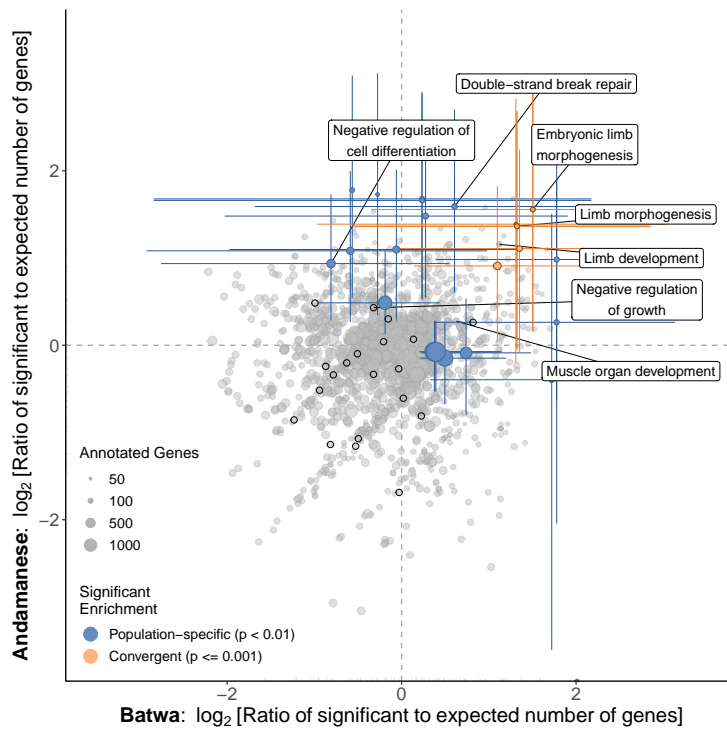

**B. Agriculturalists**

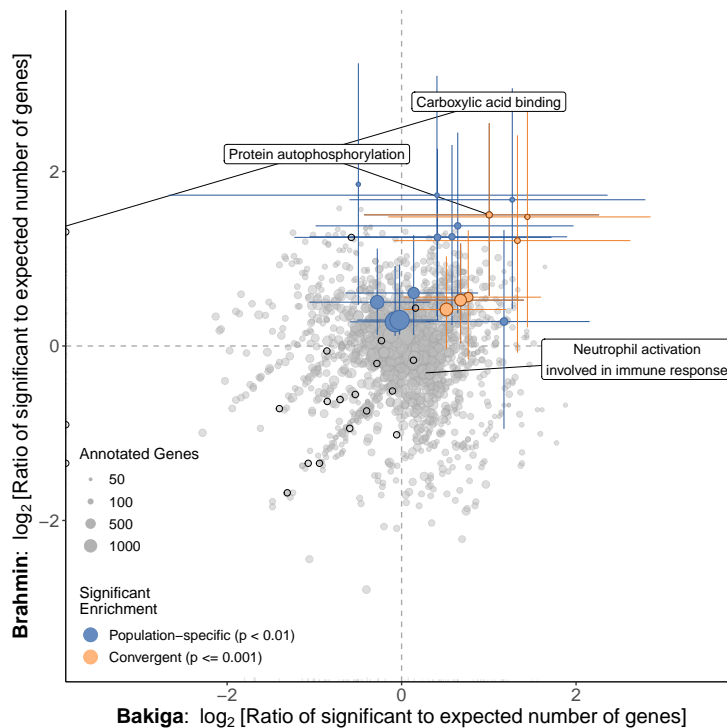

**Fig. S8.** After subsampling Batwa and Bakiga to 10 individuals per population, Gene Ontology (GO) functional categories' ratios of expected to observed counts of outlier genes (with PBS selection index  $< 0.01$ ) in the Batwa and Andamanese rainforest hunter-gatherers (A) and Bakiga and Brahmin agriculturalist control (B). Results shown for GO biological processes and molecular functions. Point size is scaled to number of annotated genes in category. Terms that are significantly overrepresented for genes under positive selection (Fisher  $p < 0.01$ ) in either population shown in blue and for both populations convergently (empirical permutation-based  $p < 0.005$ ) shown in orange. Colored lines represent 95% CI for significant categories estimated by bootstrapping genes within pathways. Black outlines indicate growth-associated terms: the 'growth' biological process (GO:0040007) and its descendant terms, or the molecular functions 'growth factor binding,' 'growth factor receptor binding,' 'growth hormone receptor activity,' and 'growth factor activity' and their sub-categories.

**Fig. S9: Gene size-corrected polygenic distribution shift test results.**

**A. Rainforest hunter-gatherers**

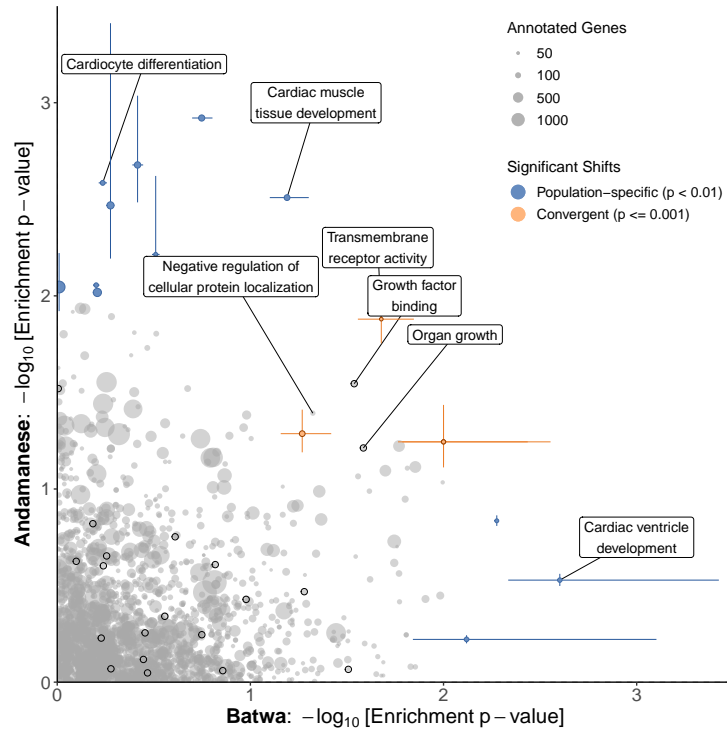

**B. Agriculturalists**

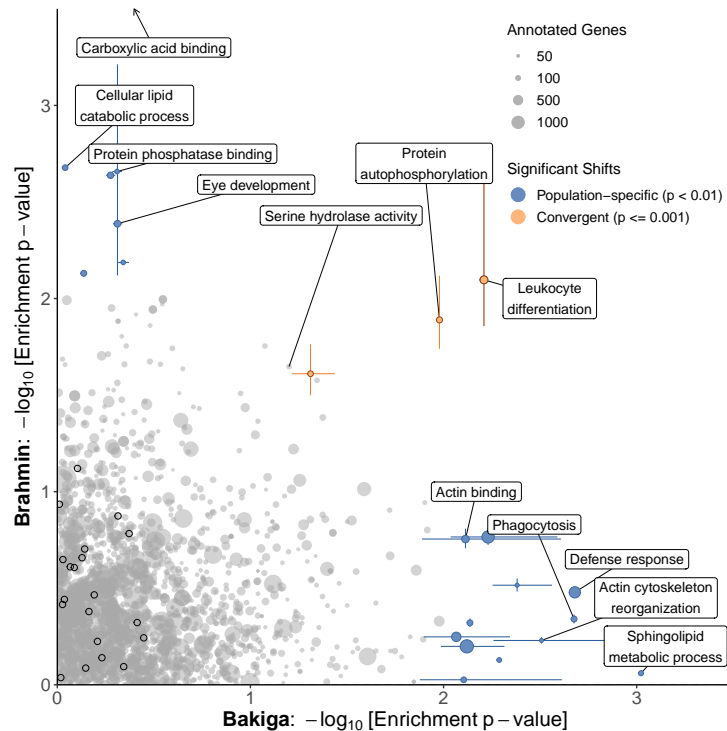

**Fig. S9.** After gene size-based correction, Gene Ontology (GO) functional categories' distribution shift test p-values, indicating a shift in the PBS selection index values for genes, in the Batwa and Andamanese rainforest hunter-gatherers (A) and Bakiga and Brahmin agriculturalist control (B). Results shown for GO biological processes and molecular functions. Point size is scaled to number of annotated genes in category. Terms that are significantly enriched for genes under positive selection (Kolmogorov-Smirnov  $p < 0.01$ ) in either population shown in blue and for both populations convergently (empirical permutation-based  $p < 0.005$ ) shown in orange. Colored lines represent 95% CI for significant categories estimated by bootstrapping genes within pathways. Black outlines indicate growth-associated terms: the 'growth' biological process (GO:0040007) and its descendant terms, or the molecular functions 'growth factor binding,' 'growth factor receptor binding,' 'growth hormone receptor activity,' and 'growth factor activity' and their sub-categories. One GO molecular function, "carboxylic acid binding" (GO:0031406; Brahmin  $p = 7.3 \times 10^{-5}$ ;  $q = 0.0157$ ) not shown.

**Fig. S10: Gene size-corrected polygenic distribution shift test results.**

**A. Rainforest hunter-gatherers**

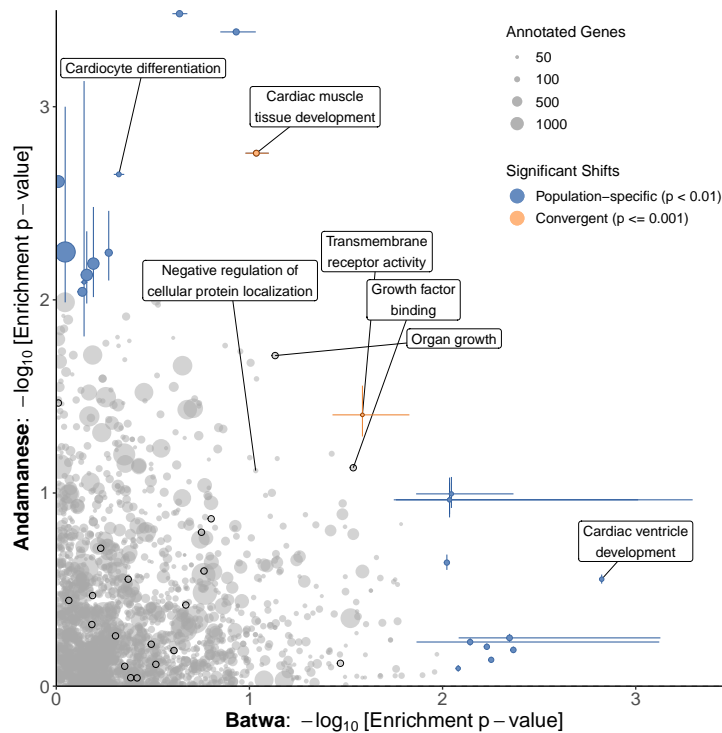

**B. Agriculturalists**

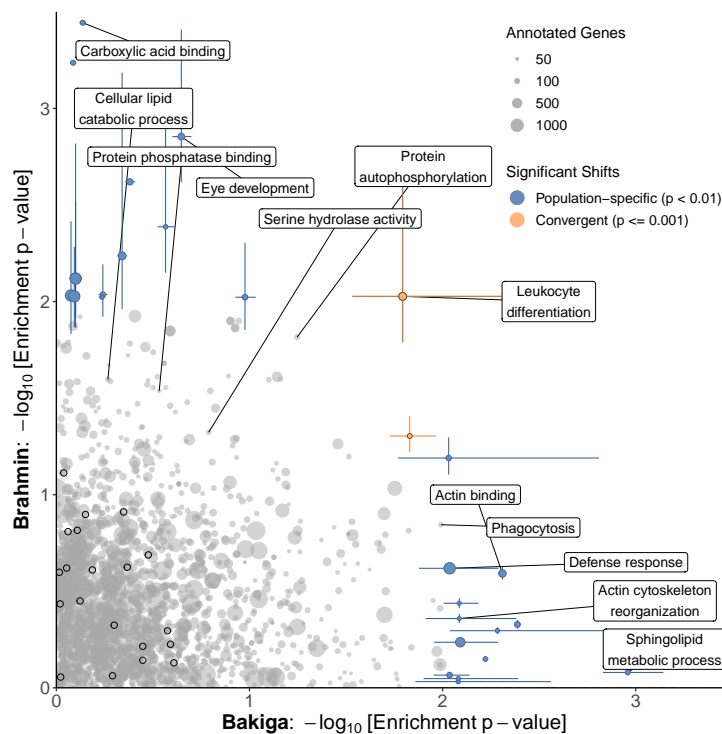

**Fig. S10.** After MAF-based correction, Gene Ontology (GO) functional categories' distribution shift test p-values, indicating a shift in the PBS selection index values for genes, in the Batwa and Andamanese rainforest hunter-gatherers (A) and Bakiga and Brahmin agriculturalist control (B). Results shown for GO biological processes and molecular functions. Point size is scaled to number of annotated genes in category. Terms that are significantly enriched for genes under positive selection (Kolmogorov-Smirnov  $p < 0.01$ ) in either population shown in blue and for both populations convergently (empirical permutation-based  $p < 0.005$ ) shown in orange. Colored lines represent 95% CI for significant categories estimated by bootstrapping genes within pathways. Black outlines indicate growth-associated terms: the 'growth' biological process (GO:0040007) and its descendant terms, or the molecular functions 'growth factor binding,' 'growth factor receptor binding,' 'growth hormone receptor activity,' and 'growth factor activity' and their sub-categories.

**Fig. S11: Gene size-corrected polygenic distribution shift test results after subsampling to  $\leq 30$  individuals per population.**

**A. Rainforest hunter-gatherers**

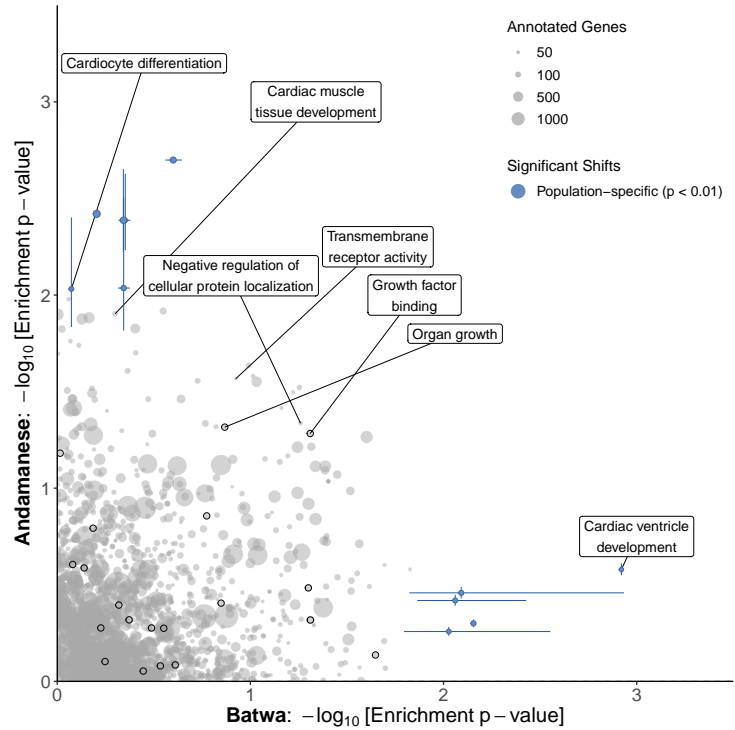

**B. Agriculturalists**

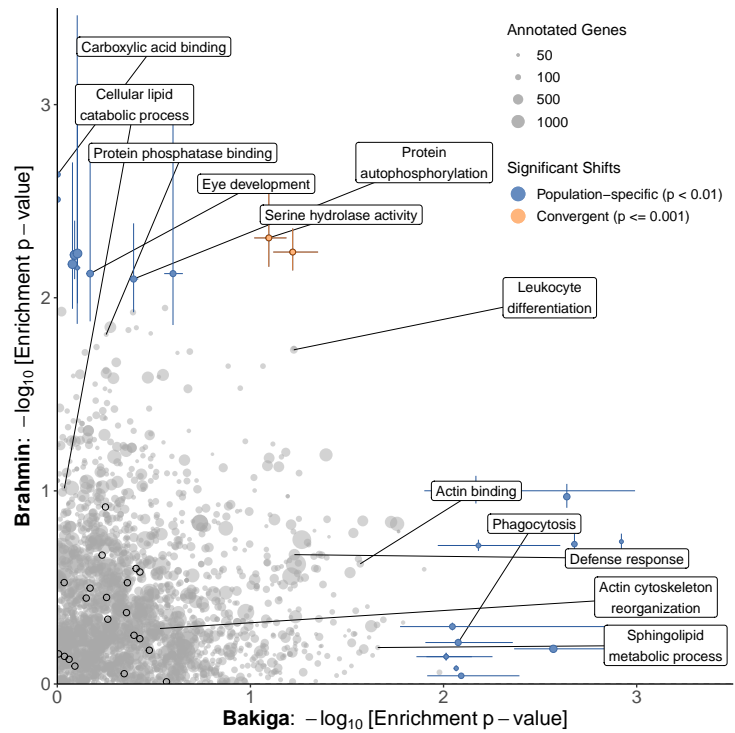

**Fig. S11.** After subsampling to  $\leq 30$  individuals per population, Gene Ontology (GO) functional categories' distribution shift test  $p$ -values, indicating a shift in the PBS selection index values for genes, in the Batwa and Andamanese rainforest hunter-gatherers (A) and Bakiga and Brahmin agriculturalist control (B). Results shown for GO biological processes and molecular functions. Point size is scaled to number of annotated genes in category. Terms that are significantly enriched for genes under positive selection (Kolmogorov-Smirnov  $p < 0.01$ ) in either population shown in blue and for both populations convergently (empirical permutation-based  $p < 0.005$ ) shown in orange. Colored lines represent 95% CI for significant categories estimated by bootstrapping genes within pathways. Black outlines indicate growth-associated terms: the 'growth' biological process (GO:0040007) and its descendant terms, or the molecular functions 'growth factor binding,' 'growth factor receptor binding,' 'growth hormone receptor activity,' and 'growth factor activity' and their sub-categories.

**Fig. S12: Gene size-corrected polygenic distribution shift test results after subsampling Batwa and Bakiga to 10 individuals per population.**

**A. Rainforest hunter-gatherers**

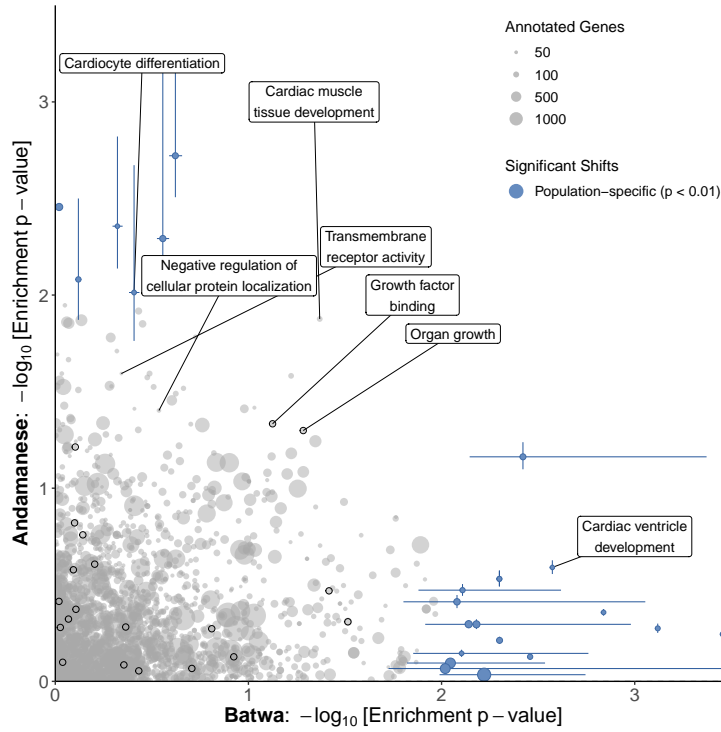

**B. Agriculturalists**

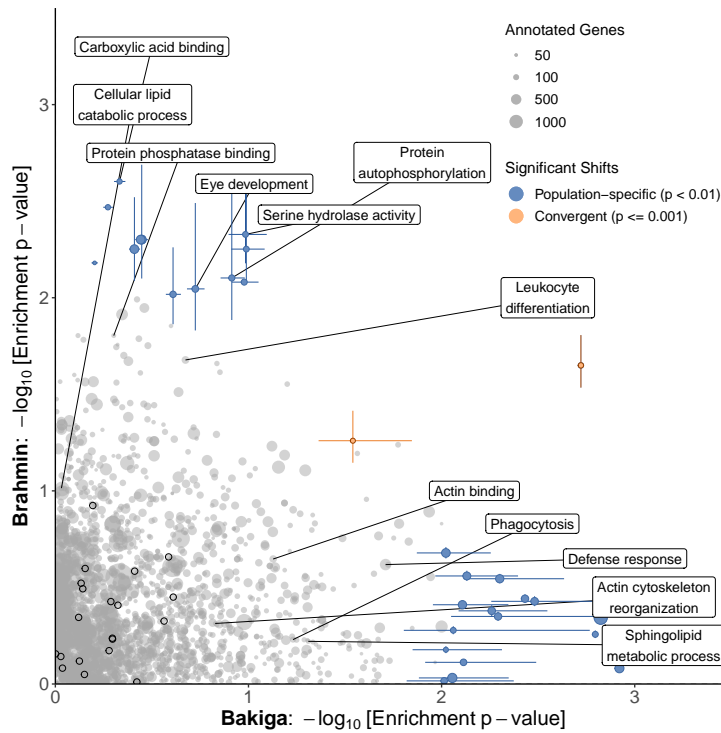

**Fig. S12.** After subsampling Batwa and Bakiga to 10 individuals per population, Gene Ontology (GO) functional categories' distribution shift test  $p$ -values, indicating a shift in the PBS selection index values for genes, in the Batwa and Andamanese rainforest hunter-gatherers (A) and Bakiga and Brahmin agriculturalist control (B). Results shown for GO biological processes and molecular functions. Point size is scaled to number of annotated genes in category. Terms that are significantly enriched for genes under positive selection (Kolmogorov-Smirnov  $p < 0.01$ ) in either population shown in blue and for both populations convergently (empirical permutation-based  $p < 0.005$ ) shown in orange. Colored lines represent 95% CI for significant categories estimated by bootstrapping genes within pathways. Black outlines indicate growth-associated terms: the 'growth' biological process (GO:0040007) and its descendant terms, or the molecular functions 'growth factor binding,' 'growth factor receptor binding,' 'growth hormone receptor activity,' and 'growth factor activity' and their sub-categories.

## 1. Tables

**Table S1. Gene Ontology (GO) biological processes with evidence of convergent enrichment for strong positive selection in the hunter-gatherer populations, as measured by outlier Population Branch Statistic (PBS) values. No molecular functions were found to be convergently enriched. Joint  $p$ -values were computed via a permutation-based method, and those with joint empirical  $p < 0.005$  are shown.**

| GO Biological Process                        | Joint $p$ | <i>Batwa:</i> |      |        |          | <i>Andamanese:</i> |      |        |          |
|----------------------------------------------|-----------|---------------|------|--------|----------|--------------------|------|--------|----------|
|                                              |           | Exp.          | Obs. | $p$    | adj. $p$ | Exp.               | Obs. | $p$    | adj. $p$ |
| GO:0030326 embryonic limb morphogenesis      | 0.000     | 1.47          | 4    | 0.0584 | 1        | 2.01               | 6    | 0.0147 | 0.901    |
| GO:0035107 appendage morphogenesis           | 0.000     | 1.69          | 5    | 0.0267 | 1        | 2.27               | 6    | 0.0254 | 0.901    |
| GO:0035108 limb morphogenesis                | 0.000     | 1.69          | 5    | 0.0267 | 1        | 2.27               | 6    | 0.0254 | 0.901    |
| GO:0035113 embryonic appendage morphogenesis | 0.000     | 1.47          | 4    | 0.0584 | 1        | 2.01               | 6    | 0.0147 | 0.901    |
| GO:0048736 appendage development             | 0.001     | 1.95          | 5    | 0.0448 | 1        | 2.62               | 6    | 0.047  | 1.000    |
| GO:0060173 limb development                  | 0.001     | 1.95          | 5    | 0.0448 | 1        | 2.62               | 6    | 0.047  | 1.000    |
| GO:0030048 actin filament-based movement     | 0.002     | 1.72          | 4    | 0.0927 | 1        | 2.33               | 5    | 0.0834 | 1.000    |
| GO:0048705 skeletal system morphogenesis     | 0.002     | 2.20          | 5    | 0.0688 | 1        | 2.95               | 6    | 0.0743 | 1.000    |
| GO:0007034 vacuolar transport                | 0.003     | 1.37          | 4    | 0.0470 | 1        | 1.75               | 4    | 0.0968 | 1.000    |



**Table S2. Gene Ontology (GO) biological processes and molecular functions with evidence of population-specific enrichment for strong positive selection in the hunter-gatherer populations, as measured by outlier Population Branch Statistic (PBS) values. Results with  $p < 0.01$  shown.**

| GO                                                     | Exp. | Obs.  | $p$    | adj. $p$ |
|--------------------------------------------------------|------|-------|--------|----------|
| <i>Batwa RHG - Biological Processes:</i>               |      |       |        |          |
| GO:0007517 muscle organ development                    | 10   | 4.02  | 0.0069 | 0.708    |
| GO:0045926 negative regulation of growth               | 7    | 2.48  | 0.0118 | 0.708    |
| <i>Andamanese RHG - Biological Processes:</i>          |      |       |        |          |
| GO:0006302 double-strand break repair                  | 10   | 3.14  | 0.0011 | 0.171    |
| GO:0070085 glycosylation                               | 12   | 4.34  | 0.0013 | 0.171    |
| GO:0000723 telomere maintenance                        | 8    | 2.30  | 0.0020 | 0.175    |
| GO:0033365 protein localization to organelle           | 25   | 14.09 | 0.0036 | 0.189    |
| GO:1903827 regulation of cellular protein localization | 19   | 9.66  | 0.0036 | 0.189    |
| GO:0007569 cell aging                                  | 6    | 1.62  | 0.0052 | 0.208    |
| GO:0009101 glycoprotein biosynthetic process           | 12   | 5.28  | 0.0065 | 0.208    |
| GO:0034613 cellular protein localization               | 41   | 27.87 | 0.0067 | 0.208    |
| GO:0051179 localization                                | 116  | 97.30 | 0.0079 | 0.208    |
| GO:0060249 anatomical structure homeostasis            | 13   | 6.09  | 0.0079 | 0.208    |
| GO:0045596 negative regulation of cell differentiation | 18   | 9.79  | 0.0090 | 0.215    |
| <i>Batwa RHG - Molecular Functions:</i>                |      |       |        |          |
| GO:0003723 RNA binding                                 | 26   | 17.66 | 0.028  | 0.732    |
| GO:0043167 ion binding                                 | 83   | 70.68 | 0.034  | 0.732    |
| <i>Andamanese RHG - Molecular Functions:</i>           |      |       |        |          |
| GO:0043130 ubiquitin binding                           | 7    | 1.89  | 0.0026 | 0.177    |
| GO:0008233 peptidase activity                          | 17   | 9.58  | 0.0153 | 0.383    |

**Table S3. Gene Ontology (GO) biological processes (BP) and molecular functions (MF) with evidence of convergent distribution shifts in PBS selection index values in the hunter-gatherer populations. Joint  $p$ -values were computed via a permutation-based method, and those with joint empirical  $p < 0.005$  are shown.**

|    |            | GO                                                   | Joint $p$ | Batwa: |          | Andamanese: |          |
|----|------------|------------------------------------------------------|-----------|--------|----------|-------------|----------|
|    |            |                                                      |           | $p$    | adj. $p$ | $p$         | adj. $p$ |
| BP | GO:0035265 | organ growth                                         | 0.001     | 0.0275 | 0.997    | 0.04509     | 1.000    |
|    | GO:0048738 | cardiac muscle tissue development                    | 0.001     | 0.0461 | 0.997    | 0.00265     | 1.000    |
|    | GO:1903828 | negative regulation of cellular protein localization | 0.001     | 0.0360 | 0.997    | 0.04275     | 1.000    |
|    | GO:0016202 | regulation of striated muscle tissue development     | 0.002     | 0.0135 | 0.997    | 0.04406     | 1.000    |
|    | GO:1901861 | regulation of muscle tissue development              | 0.002     | 0.0135 | 0.997    | 0.04406     | 1.000    |
|    | GO:0045444 | fat cell differentiation                             | 0.004     | 0.0573 | 0.997    | 0.04058     | 1.000    |
| MF | GO:0019199 | transmembrane receptor protein kinase activity       | 0.000     | 0.027  | 0.817    | 0.0261      | 0.784    |
|    | GO:0019838 | growth factor binding                                | 0.000     | 0.021  | 0.817    | 0.0269      | 0.784    |
|    | GO:0032559 | adenyl ribonucleotide binding                        | 0.003     | 0.020  | 0.817    | 0.0579      | 0.877    |
|    | GO:0030554 | adenyl nucleotide binding                            | 0.004     | 0.017  | 0.817    | 0.0755      | 0.877    |

**Table S4. Gene Ontology (GO) biological processes (BP) and molecular functions (MF) with evidence of population-specific distribution shifts in PBS selection index values in the hunter-gatherer populations. No molecular functions were found to be significantly shifted for the Batwa. Results with  $p < 0.01$  are shown.**

| GO                                            |                                                              | <i>p</i> | adj. <i>p</i> |
|-----------------------------------------------|--------------------------------------------------------------|----------|---------------|
| <i>Batwa RHG - Biological Processes:</i>      |                                                              |          |               |
| GO:0003231                                    | cardiac ventricle development                                | 0.001    | 0.302         |
| GO:0061351                                    | neural precursor cell proliferation                          | 0.007    | 0.348         |
| GO:0034976                                    | response to endoplasmic reticulum stress                     | 0.009    | 0.348         |
| <i>Andamanese RHG - Biological Processes:</i> |                                                              |          |               |
| GO:0016579                                    | protein deubiquitination                                     | 0.001    | 0.232         |
| GO:0035051                                    | cardiocyte differentiation                                   | 0.002    | 0.232         |
| GO:0048738                                    | cardiac muscle tissue development                            | 0.003    | 0.232         |
| GO:1901800                                    | positive regulation of proteasomal protein catabolic process | 0.004    | 0.262         |
| GO:0006508                                    | proteolysis                                                  | 0.009    | 0.453         |
| <i>Andamanese RHG - Molecular Functions:</i>  |                                                              |          |               |
| GO:0005085                                    | guanyl-nucleotide exchange factor activity                   | 0.005    | 0.278         |

**Table S5. After gene size-based correction, Gene Ontology (GO) biological processes and molecular functions with evidence of convergent enrichment for strong positive selection in the hunter-gatherer populations, as measured by outlier Population Branch Statistic (PBS) values. Joint  $p$ -values were computed via a permutation-based method, and those with joint empirical  $p < 0.005$  are shown.**

| GO Biological Process |                                                  | Joint $p$ | <i>Batwa:</i> |      |        |          | <i>Andamanese:</i> |      |        |          |
|-----------------------|--------------------------------------------------|-----------|---------------|------|--------|----------|--------------------|------|--------|----------|
|                       |                                                  |           | Exp.          | Obs. | $p$    | adj. $p$ | Exp.               | Obs. | $p$    | adj. $p$ |
| GO:0035107            | appendage morphogenesis                          | 0.000     | 1.77          | 5    | 0.0315 | 1        | 2.28               | 6    | 0.0258 | 0.966    |
| GO:0035108            | limb morphogenesis                               | 0.000     | 1.77          | 5    | 0.0315 | 1        | 2.28               | 6    | 0.0258 | 0.966    |
| GO:0048736            | appendage development                            | 0.000     | 2.04          | 5    | 0.0524 | 1        | 2.64               | 6    | 0.0478 | 1.000    |
| GO:0060173            | limb development                                 | 0.000     | 2.04          | 5    | 0.0524 | 1        | 2.64               | 6    | 0.0478 | 1.000    |
| GO:1901617            | organic hydroxy compound biosynthetic process    | 0.000     | 2.38          | 6    | 0.0314 | 1        | 3.19               | 7    | 0.0401 | 0.980    |
| GO:0030326            | embryonic limb morphogenesis                     | 0.001     | 1.53          | 4    | 0.0665 | 1        | 2.02               | 6    | 0.0150 | 0.966    |
| GO:0035113            | embryonic appendage morphogenesis                | 0.001     | 1.53          | 4    | 0.0665 | 1        | 2.02               | 6    | 0.0150 | 0.966    |
| GO:0030048            | actin filament-based movement                    | 0.002     | 1.80          | 6    | 0.0089 | 1        | 2.34               | 5    | 0.0845 | 1.000    |
| GO:0007034            | vacuolar transport                               | 0.004     | 1.43          | 4    | 0.0537 | 1        | 1.76               | 4    | 0.0979 | 1.000    |
| GO Molecular Function |                                                  | Joint $p$ | <i>Batwa:</i> |      |        |          | <i>Andamanese:</i> |      |        |          |
|                       |                                                  |           | Exp.          | Obs. | $p$    | adj. $p$ | Exp.               | Obs. | $p$    | adj. $p$ |
| GO:0008514            | organic anion transmembrane transporter activity | 0.000     | 2.78          | 7    | 0.0212 | 0.6853   | 3.37               | 7    | 0.0515 | 0.902    |
| GO:0015081            | sodium ion transmembrane transporter activity    | 0.000     | 2.31          | 7    | 0.0081 | 0.6853   | 2.93               | 6    | 0.0726 | 0.902    |

**Table S6. After MAF-based correction, Gene Ontology (GO) biological processes and molecular functions with evidence of convergent enrichment for strong positive selection in the hunter-gatherer populations, as measured by outlier Population Branch Statistic (PBS) values. Joint  $p$ -values were computed via a permutation-based method, and those with joint empirical  $p < 0.005$  are shown.**

|            | GO Biological Process                                           | Joint $p$ | Batwa: |      |        |          | Andamanese: |      |         |          |
|------------|-----------------------------------------------------------------|-----------|--------|------|--------|----------|-------------|------|---------|----------|
|            |                                                                 |           | Exp.   | Obs. | $p$    | adj. $p$ | Exp.        | Obs. | $p$     | adj. $p$ |
| GO:0048522 | positive regulation of cellular process                         | 0.000     | 55.57  | 66   | 0.0534 | 1        | 87.93       | 106  | 0.01153 | 0.946    |
| GO:1901617 | organic hydroxy compound biosynthetic process                   | 0.000     | 2.29   | 6    | 0.0267 | 1        | 3.66        | 9    | 0.01069 | 0.946    |
| GO:0006302 | double-strand break repair                                      | 0.001     | 2.26   | 5    | 0.0757 | 1        | 3.62        | 8    | 0.02808 | 0.946    |
| GO:0006897 | endocytosis                                                     | 0.001     | 8.49   | 14   | 0.0447 | 1        | 13.76       | 22   | 0.01948 | 0.946    |
| GO:0048738 | cardiac muscle tissue development                               | 0.001     | 2.52   | 6    | 0.0399 | 1        | 4.01        | 8    | 0.04694 | 0.946    |
| GO:0080135 | regulation of cellular response to stress                       | 0.001     | 7.63   | 14   | 0.0203 | 1        | 11.95       | 20   | 0.01624 | 0.946    |
| GO:0014706 | striated muscle tissue development                              | 0.002     | 4.07   | 8    | 0.0509 | 1        | 6.55        | 14   | 0.00585 | 0.946    |
| GO:0070302 | regulation of stress-activated protein kinase signaling cascade | 0.002     | 2.52   | 6    | 0.0399 | 1        | 3.93        | 7    | 0.09815 | 0.946    |
| GO:1901615 | organic hydroxy compound metabolic process                      | 0.002     | 5.70   | 9    | 0.1168 | 1        | 8.87        | 14   | 0.06046 | 0.946    |
| GO:2001020 | regulation of response to DNA damage stimulus                   | 0.002     | 2.09   | 5    | 0.0572 | 1        | 3.35        | 7    | 0.04997 | 0.946    |
| GO:0051592 | response to calcium ion                                         | 0.003     | 1.75   | 6    | 0.0079 | 1        | 2.74        | 5    | 0.13789 | 0.946    |
| GO:0015718 | monocarboxylic acid transport                                   | 0.004     | 1.63   | 4    | 0.0793 | 1        | 2.39        | 5    | 0.08980 | 0.946    |
| GO:0030048 | actin filament-based movement                                   | 0.004     | 1.73   | 4    | 0.0942 | 1        | 2.78        | 7    | 0.02039 | 0.946    |
| GO:0030326 | embryonic limb morphogenesis                                    | 0.004     | 1.48   | 4    | 0.0594 | 1        | 2.31        | 5    | 0.08052 | 0.946    |
| GO:0031098 | stress-activated protein kinase signaling                       | 0.004     | 3.15   | 7    | 0.0383 | 1        | 4.97        | 8    | 0.12454 | 0.946    |
| GO:0035113 | embryonic appendage morphogenesis                               | 0.004     | 1.48   | 4    | 0.0594 | 1        | 2.31        | 5    | 0.08052 | 0.946    |
| GO:0060537 | muscle tissue development                                       | 0.004     | 4.30   | 8    | 0.0660 | 1        | 6.90        | 14   | 0.00910 | 0.946    |
|            | GO Molecular Function                                           | Joint $p$ | Batwa: |      |        |          | Andamanese: |      |         |          |
|            |                                                                 |           | Exp.   | Obs. | $p$    | adj. $p$ | Exp.        | Obs. | $p$     | adj. $p$ |
| GO:0008514 | organic anion transmembrane transporter activity                | 0.002     | 2.68   | 6    | 0.051  | 0.798    | 4.03        | 10   | 0.0068  | 0.959    |
| GO:0005342 | organic acid transmembrane transporter activity                 | 0.003     | 1.97   | 5    | 0.046  | 0.798    | 2.96        | 7    | 0.0282  | 1.000    |
| GO:0015081 | sodium ion transmembrane transporter activity                   | 0.003     | 2.22   | 5    | 0.071  | 0.821    | 3.50        | 7    | 0.0600  | 1.000    |
| GO:0046943 | carboxylic acid transmembrane transporter activity              | 0.004     | 1.79   | 4    | 0.103  | 0.964    | 2.70        | 7    | 0.0177  | 1.000    |

**Table S7. After subsampling to  $\leq 30$  individuals per population, Gene Ontology (GO) biological processes and molecular functions with evidence of convergent enrichment for strong positive selection in the hunter-gatherer populations, as measured by outlier Population Branch Statistic (PBS) values. Joint  $p$ -values were computed via a permutation-based method, and those with joint empirical  $p < 0.005$  are shown.**

| GO Biological Process |                                               | Joint $p$ | Batwa: |      |         |          | Andamanese: |      |        |          |
|-----------------------|-----------------------------------------------|-----------|--------|------|---------|----------|-------------|------|--------|----------|
|                       |                                               |           | Exp.   | Obs. | $p$     | adj. $p$ | Exp.        | Obs. | $p$    | adj. $p$ |
| GO:0030326            | embryonic limb morphogenesis                  | 0         | 1.44   | 5    | 0.0142  | 1        | 2.06        | 6    | 0.0165 | 1        |
| GO:0035107            | appendage morphogenesis                       | 0         | 1.67   | 6    | 0.0062  | 1        | 2.36        | 6    | 0.0302 | 1        |
| GO:0035108            | limb morphogenesis                            | 0         | 1.67   | 6    | 0.0062  | 1        | 2.36        | 6    | 0.0302 | 1        |
| GO:0035113            | embryonic appendage morphogenesis             | 0         | 1.44   | 5    | 0.0142  | 1        | 2.06        | 6    | 0.0165 | 1        |
| GO:0048736            | appendage development                         | 0         | 1.92   | 6    | 0.012   | 1        | 2.73        | 6    | 0.0548 | 1        |
| GO:0060173            | limb development                              | 0         | 1.92   | 6    | 0.012   | 1        | 2.73        | 6    | 0.0548 | 1        |
| GO:0030048            | actin filament-based movement                 | 0.001     | 1.79   | 6    | 0.0088  | 1        | 2.56        | 5    | 0.1127 | 1        |
| GO:1901617            | organic hydroxy compound biosynthetic process | 0.003     | 2.71   | 6    | 0.0539  | 1        | 3.92        | 7    | 0.0978 | 1        |
| GO:0006282            | regulation of DNA repair                      | 0.004     | 1.29   | 3    | 0.1387  | 1        | 1.9         | 6    | 0.0112 | 1        |
| GO:0006898            | receptor-mediated endocytosis                 | 0.004     | 3.41   | 7    | 0.0543  | 1        | 4.99        | 8    | 0.1266 | 1        |
| GO Molecular Function |                                               | Joint $p$ | Batwa: |      |         |          | Andamanese: |      |        |          |
|                       |                                               |           | Exp.   | Obs. | $p$     | adj. $p$ | Exp.        | Obs. | $p$    | adj. $p$ |
| GO:0003779            | actin binding                                 | 0.004     | 5.44   | 9    | 0.09466 | 0.643688 | 7           | 13   | 0.023  | 1        |
| GO:0005342            | organic acid transmembrane transporter...     | 0.004     | 2.01   | 6    | 0.01482 | 0.25194  | 2.71        | 5    | 0.134  | 1        |
| GO:0046943            | carboxylic acid transmembrane transporter...  | 0.004     | 2.01   | 6    | 0.01482 | 0.25194  | 2.71        | 5    | 0.134  | 1        |

**Table S8. After subsampling Batwa and Bakiga to 10 individuals per population, Gene Ontology (GO) biological processes and molecular functions with evidence of convergent enrichment for strong positive selection in the hunter-gatherer populations, as measured by outlier Population Branch Statistic (PBS) values. Joint  $p$ -values were computed via a permutation-based method, and those with joint empirical  $p < 0.005$  are shown.**

| GO Biological Process |                                                                   | Joint $p$ | Batwa: |      |        |          | Andamanese: |      |        |          |
|-----------------------|-------------------------------------------------------------------|-----------|--------|------|--------|----------|-------------|------|--------|----------|
|                       |                                                                   |           | Exp.   | Obs. | $p$    | adj. $p$ | Exp.        | Obs. | $p$    | adj. $p$ |
| GO:0030326            | embryonic limb morphogenesis                                      | 0.000     | 1.41   | 4    | 0.0516 | 1        | 2.04        | 6    | 0.0157 | 1        |
| GO:0035107            | appendage morphogenesis                                           | 0.000     | 1.6    | 4    | 0.0757 | 1        | 2.33        | 6    | 0.0287 | 1        |
| GO:0035108            | limb morphogenesis                                                | 0.000     | 1.6    | 4    | 0.0757 | 1        | 2.33        | 6    | 0.0287 | 1        |
| GO:0035113            | embryonic appendage morphogenesis                                 | 0.000     | 1.41   | 4    | 0.0516 | 1        | 2.04        | 6    | 0.0157 | 1        |
| GO:0071103            | DNA conformation change                                           | 0.000     | 2.35   | 6    | 0.0301 | 1        | 3.71        | 8    | 0.0322 | 1        |
| GO:0002822            | regulation of adaptive immune response...                         | 0.001     | 1.21   | 3    | 0.1206 | 1        | 1.91        | 5    | 0.0411 | 1        |
| GO:0002700            | regulation of production of molecular mediator of immune response | 0.002     | 1.26   | 4    | 0.0368 | 1        | 1.87        | 4    | 0.1168 | 1        |
| GO:1901617            | organic hydroxy compound biosynthetic process                     | 0.002     | 2.57   | 6    | 0.0436 | 1        | 3.88        | 7    | 0.0932 | 1        |
| GO:0006282            | regulation of DNA repair                                          | 0.003     | 1.24   | 3    | 0.126  | 1        | 1.87        | 6    | 0.0106 | 1        |
| GO:0006457            | protein folding                                                   | 0.004     | 2.6    | 6    | 0.0453 | 1        | 3.88        | 7    | 0.0932 | 1        |
| GO Molecular Function |                                                                   | Joint $p$ | Batwa: |      |        |          | Andamanese: |      |        |          |
|                       |                                                                   |           | Exp.   | Obs. | $p$    | adj. $p$ | Exp.        | Obs. | $p$    | adj. $p$ |
| GO:0003779            | actin binding                                                     | 0.000     | 5.14   | 11   | 0.0137 | 0.73158  | 6.92        | 13   | 0.021  | 1        |
| GO:0003729            | mRNA binding                                                      | 0.002     | 2.45   | 6    | 0.0354 | 1        | 3.24        | 6    | 0.105  | 1        |
| GO:0051015            | actin filament binding                                            | 0.002     | 2.15   | 5    | 0.0638 | 1        | 3.02        | 6    | 0.081  | 1        |

**Table S9. After gene size-based correction, Gene Ontology (GO) biological processes with evidence of population-specific enrichment for strong positive selection in the hunter-gatherer populations, as measured by outlier Population Branch Statistic (PBS) values. Results with  $p < 0.01$  shown.**

| GO                                                       | Exp. | Obs.  | $p$    | adj. $p$ |
|----------------------------------------------------------|------|-------|--------|----------|
| <i>Batwa RHG - Biological Processes:</i>                 |      |       |        |          |
| GO:0007517 muscle organ development                      | 11   | 4.20  | 0.0032 | 0.5650   |
| GO:1903825 organic acid transmembrane transport          | 6    | 1.67  | 0.0061 | 0.5652   |
| GO:0030048 actin filament-based movement                 | 6    | 1.80  | 0.0061 | 0.5652   |
| <i>Andamanese RHG - Biological Processes:</i>            |      |       |        |          |
| GO:0006302 double-strand break repair                    | 10   | 3.16  | 0.0012 | 0.231    |
| GO:0000723 telomere maintenance                          | 8    | 2.31  | 0.0020 | 0.231    |
| GO:1903827 regulation of cellular protein localization   | 19   | 9.70  | 0.0038 | 0.231    |
| GO:0070085 glycosylation                                 | 11   | 4.36  | 0.0042 | 0.231    |
| GO:1900180 regulation of protein localization to nucleus | 10   | 3.77  | 0.0044 | 0.231    |
| GO:0007569 cell aging                                    | 6    | 1.63  | 0.0053 | 0.232    |
| GO:0060249 anatomical structure homeostasis              | 13   | 6.12  | 0.0082 | 0.299    |
| GO:0051234 establishment of localization                 | 99   | 81.24 | 0.0091 | 0.299    |
| <i>Batwa RHG - Molecular Functions:</i>                  |      |       |        |          |
| GO:0015081 sodium ion transmembrane transporter activity | 7    | 2.31  | 0.0081 | 0.33245  |
| <i>Andamanese RHG - Molecular Functions:</i>             |      |       |        |          |
| GO:0043130 ubiquitin binding                             | 7    | 1.89  | 0.0026 | 0.177    |



**Table S10. After MAF-based correction, Gene Ontology (GO) biological processes with evidence of population-specific enrichment for strong positive selection in the hunter-gatherer populations, as measured by outlier Population Branch Statistic (PBS) values. No molecular functions were found to be significantly shifted for the Batwa. Results with  $p < 0.01$  shown.**

| GO                                                                    | Exp. | Obs.   | $p$     | adj. $p$ |
|-----------------------------------------------------------------------|------|--------|---------|----------|
| <i>Batwa RHG - Biological Processes:</i>                              |      |        |         |          |
| GO:0007517 muscle organ development                                   | 11   | 4.04   | 0.0023  | 0.492    |
| GO:0051592 response to calcium ion                                    | 6    | 1.75   | 0.0079  | 0.492    |
| <i>Andamanese RHG - Biological Processes:</i>                         |      |        |         |          |
| GO:0051179 localization                                               | 142  | 114.34 | 0.00044 | 0.115    |
| GO:0045596 negative regulation of cell differentiation                | 22   | 11.53  | 0.0026  | 0.266    |
| GO:0071229 cellular response to acid chemical                         | 9    | 3.24   | 0.0048  | 0.266    |
| GO:0002460 adaptive immune response based on somatic recombination... | 11   | 4.47   | 0.0050  | 0.266    |
| GO:0014706 striated muscle tissue development                         | 14   | 6.55   | 0.0059  | 0.266    |
| GO:0048584 positive regulation of response to stimulus                | 53   | 38.05  | 0.0067  | 0.266    |
| GO:0016337 single organismal cell-cell adhesion                       | 22   | 12.61  | 0.0076  | 0.266    |
| <i>Andamanese RHG - Molecular Functions:</i>                          |      |        |         |          |
| GO:0043130 ubiquitin binding                                          | 7    | 2.24   | 0.0067  | 0.221    |
| GO:0008514 organic anion transmembrane transporter activity           | 10   | 4.03   | 0.0068  | 0.221    |

**Table S11. After subsampling to  $\leq 30$  individuals per population, Gene Ontology (GO) biological processes with evidence of population-specific enrichment for strong positive selection in the hunter-gatherer populations, as measured by outlier Population Branch Statistic (PBS) values. No molecular functions were found to be significantly shifted for the Andamanese. Results with  $p < 0.01$  shown.**

| GO                                                      | Exp.  | Obs. | $p$     | adj. $p$ |
|---------------------------------------------------------|-------|------|---------|----------|
| <i>Batwa RHG - Biological Processes:</i>                |       |      |         |          |
| GO:0045926 negative regulation of growth                | 2.66  | 8    | 0.005   | 0.497    |
| GO:0035107 appendage morphogenesis                      | 1.67  | 6    | 0.0062  | 0.497    |
| GO:0030048 actin filament-based movement                | 1.79  | 6    | 0.0088  | 0.497    |
| <i>Batwa RHG - Molecular Functions:</i>                 |       |      |         |          |
| GO:0005525 GTP binding                                  | 3.33  | 12   | 0.00012 | 0.00828  |
| GO:0019001 guanyl nucleotide binding                    | 3.66  | 12   | 0.0028  | 0.00966  |
| GO:0003924 GTPase activity                              | 2.53  | 9    | 0.00092 | 0.0212   |
| GO:0035639 purine ribonucleoside triphosphate binding   | 21.36 | 34   | 0.00369 | 0.0637   |
| <i>Andamanese RHG - Biological Processes:</i>           |       |      |         |          |
| GO:0006302 double-strand break repair                   | 3.36  | 10   | 0.0019  | 0.216    |
| GO:0002460 adaptive immune response based on somatic... | 3.99  | 11   | 0.0021  | 0.216    |
| GO:0060249 anatomical structure homeostasis             | 6.69  | 15   | 0.0028  | 0.216    |
| GO:0000723 telomere maintenance                         | 2.53  | 8    | 0.0036  | 0.216    |
| GO:0051053 negative regulation of DNA metabolic process | 2.06  | 7    | 0.0043  | 0.216    |
| GO:0045596 negative regulation of cell differentiation  | 10.58 | 20   | 0.0045  | 0.216    |
| GO:0007569 cell aging                                   | 1.83  | 6    | 0.0095  | 0.346    |

**Table S12. After subsampling Batwa and Bakiga to 10 individuals per population, Gene Ontology (GO) biological processes with evidence of population-specific enrichment for strong positive selection in the hunter-gatherer populations, as measured by outlier Population Branch Statistic (PBS) values. Results with  $p < 0.01$  shown.**

| GO                                                      | Exp.  | Obs. | $p$    | adj. $p$ |
|---------------------------------------------------------|-------|------|--------|----------|
| <i>Batwa RHG - Biological Processes:</i>                |       |      |        |          |
| GO:0006354 DNA-templated transcription, elongation      | 1.24  | 5    | 0.0076 | 0.604    |
| GO:0000077 DNA damage checkpoint                        | 1.75  | 6    | 0.0078 | 0.604    |
| GO:0030048 actin filament-based movement                | 1.75  | 6    | 0.0078 | 0.604    |
| GO:0016125 sterol metabolic process                     | 1.82  | 6    | 0.0094 | 0.604    |
| <i>Batwa RHG - Molecular Functions:</i>                 |       |      |        |          |
| GO:1901363 heterocyclic compound binding                | 60.18 | 79   | 0.0016 | 0.106    |
| <i>Andamanese RHG - Biological Processes:</i>           |       |      |        |          |
| GO:0006302 double-strand break repair                   | 3.32  | 10   | 0.0017 | 0.230    |
| GO:0002460 adaptive immune response based on somatic... | 3.94  | 11   | 0.0019 | 0.230    |
| GO:0000723 telomere maintenance                         | 2.5   | 8    | 0.0033 | 0.230    |
| GO:0045596 negative regulation of cell differentiation  | 10.45 | 20   | 0.0039 | 0.230    |
| GO:0051053 negative regulation of DNA metabolic process | 2.04  | 7    | 0.004  | 0.230    |
| GO:0060249 anatomical structure homeostasis             | 6.61  | 14   | 0.0063 | 0.302    |
| GO:0007569 cell aging                                   | 1.81  | 6    | 0.0089 | 0.323    |
| <i>Andamanese RHG - Molecular Functions:</i>            |       |      |        |          |
| GO:0140096 catalytic activity, acting on a protein      | 35.68 | 50   | 0.007  | 0.380    |

**Table S13. After gene size-based correction, Gene Ontology (GO) biological processes (BP) and molecular functions (MF) with evidence of convergent distribution shifts in PBS selection index values in the hunter-gatherer populations. Joint  $p$ -values were computed via a permutation-based method, and those with joint empirical  $p < 0.005$  are shown.**

| GO |            |                                                      | Joint $p$ | Batwa: |          | Andamanese: |          |
|----|------------|------------------------------------------------------|-----------|--------|----------|-------------|----------|
|    |            |                                                      |           | $p$    | adj. $p$ | $p$         | adj. $p$ |
| BP | GO:0016202 | regulation of striated muscle tissue development     | 0.000     | 0.0100 | 0.994    | 0.0570      | 1.000    |
|    | GO:1901861 | regulation of muscle tissue development              | 0.000     | 0.0100 | 0.994    | 0.0570      | 1.000    |
|    | GO:0045444 | fat cell differentiation                             | 0.001     | 0.0539 | 0.994    | 0.0517      | 1.000    |
|    | GO:0048634 | regulation of muscle organ development               | 0.002     | 0.0101 | 0.994    | 0.0924      | 1.000    |
|    | GO:0035265 | organ growth                                         | 0.003     | 0.0260 | 0.994    | 0.0613      | 1.000    |
|    | GO:0048738 | cardiac muscle tissue development                    | 0.003     | 0.0646 | 0.994    | 0.0031      | 1.000    |
|    | GO:0051147 | regulation of muscle cell differentiation            | 0.003     | 0.0242 | 0.994    | 0.1026      | 1.000    |
|    | GO:1903828 | negative regulation of cellular protein localization | 0.003     | 0.0475 | 0.994    | 0.0405      | 1.000    |
|    | GO:0046434 | organophosphate catabolic process                    | 0.004     | 0.0154 | 0.994    | 0.0780      | 1.000    |
| MF | GO:0019199 | transmembrane receptor protein kinase activity       | 0.000     | 0.021  | 0.698    | 0.0132      | 0.736    |
|    | GO:0019838 | growth factor binding                                | 0.002     | 0.029  | 0.750    | 0.0285      | 0.736    |
|    | GO:0030554 | adenyl nucleotide binding                            | 0.002     | 0.014  | 0.698    | 0.0769      | 0.877    |
|    | GO:0032559 | adenyl ribonucleotide binding                        | 0.002     | 0.017  | 0.698    | 0.0599      | 0.877    |
|    |            |                                                      |           |        |          |             |          |

**Table S14. After MAF-based correction, Gene Ontology (GO) biological processes (BP) and molecular functions (MF) with evidence of convergent distribution shifts in PBS selection index values in the hunter-gatherer populations. Joint  $p$ -values were computed via a permutation-based method, and those with joint empirical  $p < 0.005$  are shown.**

|    | GO         | GO                                             | Joint $p$ | Batwa: |          | Andamanese: |          |
|----|------------|------------------------------------------------|-----------|--------|----------|-------------|----------|
|    |            |                                                |           | $p$    | adj. $p$ | $p$         | adj. $p$ |
| BP | GO:0048738 | cardiac muscle tissue development              | 0.000     | 0.0921 | 0.993    | 0.00174     | 0.878    |
|    | GO:0033002 | muscle cell proliferation                      | 0.002     | 0.0919 | 0.993    | 0.02565     | 1.000    |
|    | GO:0035265 | organ growth                                   | 0.003     | 0.0736 | 0.993    | 0.01943     | 1.000    |
|    | GO:0003007 | heart morphogenesis                            | 0.004     | 0.0375 | 0.993    | 0.06262     | 1.000    |
|    | GO:0016579 | protein deubiquitination                       | 0.004     | 0.1171 | 0.993    | 0.00041     | 0.369    |
| MF | GO:0019199 | transmembrane receptor protein kinase activity | 0.001     | 0.026  | 0.675    | 0.039       | 0.874    |

**Table S15. After subsampling to  $\leq 30$  individuals per population, Gene Ontology (GO) biological processes (BP) and molecular functions (MF) with evidence of convergent distribution shifts in PBS selection index values in the hunter-gatherer populations. Joint  $p$ -values were computed via a permutation-based method, and those with joint empirical  $p < 0.005$  are shown.**

| GO |            |                                                 | Joint $p$ | Batwa: |          | Andamanese: |          |
|----|------------|-------------------------------------------------|-----------|--------|----------|-------------|----------|
|    |            |                                                 |           | $p$    | adj. $p$ | $p$         | adj. $p$ |
| BP | GO:0034655 | nucleobase-containing compound catabolic...     | 0.002     | 0.0484 | 0.999    | 0.0122      | 0.0669   |
| BP | GO:0051250 | negative regulation of lymphocyte activation... | 0.002     | 0.0602 | 0.999    | 0.00917     | 0.0290   |
| BP | GO:1903828 | negative regulation of cellular protein...      | 0.002     | 0.055  | 0.999    | 0.00990     | 0.0390   |
| BP | GO:0006282 | regulation of DNA repair                        | 0.003     | 0.0691 | 0.999    | 0.00393     | 0.0340   |
| BP | GO:0046700 | heterocycle catabolic process                   | 0.003     | 0.0355 | 0.999    | 0.0175      | 0.0870   |
| BP | GO:0044270 | cellular nitrogen compound catabolic process    | 0.004     | 0.0411 | 0.999    | 0.0129      | 0.0789   |
| MF | GO:0004702 | signal transducer, downstream of receptor...    | 0.002     | 0.064  | 0.915    | 0.00977     | 0.0509   |
| MF | GO:0008144 | drug binding                                    | 0.002     | 0.025  | 0.915    | 0.00722     | 0.0579   |
| MF | GO:0019838 | growth factor binding                           | 0.003     | 0.049  | 0.915    | 0.00927     | 0.0260   |

**Table S16.** After subsampling Batwa and Bakiga to 10 individuals per population, Gene Ontology (GO) biological processes (BP) and molecular functions (MF) with evidence of convergent distribution shifts in PBS selection index values in the hunter-gatherer populations. Joint  $p$ -values were computed via a permutation-based method, and those with joint empirical  $p < 0.005$  are shown.

| GO |            |                                   | Joint $p$ | Batwa:  |          | Andamanese: |          |
|----|------------|-----------------------------------|-----------|---------|----------|-------------|----------|
|    |            |                                   |           | $p$     | adj. $p$ | $p$         | adj. $p$ |
| BP | GO:0003007 | heart morphogenesis               | 0.002     | 0.00379 | 0.868    | 0.0110      | 0.0579   |
| BP | GO:0016197 | endosomal transport               | 0.002     | 0.0601  | 0.992    | 0.0105      | 0.0240   |
| BP | GO:0035265 | organ growth                      | 0.002     | 0.05203 | 0.988    | 0.0131      | 0.0579   |
| BP | GO:0007498 | mesoderm development              | 0.003     | 0.0931  | 0.992    | 0.00951     | 0.0320   |
| BP | GO:0048738 | cardiac muscle tissue development | 0.003     | 0.0428  | 0.977    | 0.00943     | 0.0160   |
| MF | GO:0019838 | growth factor binding             | 0.003     | 0.075   | 0.829    | 0.0131      | 0.0450   |

**Table S17. After gene size-based correction, Gene Ontology (GO) biological processes (BP) and molecular functions (MF) with evidence of population-specific distribution shifts in PBS selection index values in the hunter-gatherer populations. No molecular functions were found to be significantly shifted for the Batwa. Results with  $p < 0.01$  are shown.**

| GO                                            |                                                              | <i>p</i> | adj. <i>p</i> |
|-----------------------------------------------|--------------------------------------------------------------|----------|---------------|
| <i>Batwa RHG - Biological Processes:</i>      |                                                              |          |               |
| GO:0003231                                    | cardiac ventricle development                                | 0.0025   | 0.371         |
| GO:0061351                                    | neural precursor cell proliferation                          | 0.0080   | 0.371         |
| <i>Andamanese RHG - Biological Processes:</i> |                                                              |          |               |
| GO:0016579                                    | protein deubiquitination                                     | 0.001    | 0.273         |
| GO:0035051                                    | cardiocyte differentiation                                   | 0.003    | 0.273         |
| GO:0048738                                    | cardiac muscle tissue development                            | 0.003    | 0.273         |
| GO:1901800                                    | positive regulation of proteasomal protein catabolic process | 0.006    | 0.322         |
| GO:0001936                                    | regulation of endothelial cell proliferation                 | 0.006    | 0.322         |
| GO:0006508                                    | proteolysis                                                  | 0.009    | 0.396         |
| <i>Andamanese RHG - Molecular Functions:</i>  |                                                              |          |               |
| GO:0005085                                    | guanyl-nucleotide exchange factor activity                   | 0.0034   | 0.224         |
| GO:0008134                                    | transcription factor binding                                 | 0.0096   | 0.224         |



**Table S18. After MAF-based correction, Gene Ontology (GO) biological processes (BP) and molecular functions (MF) with evidence of population-specific distribution shifts in PBS selection index values in the hunter-gatherer populations. No molecular functions were found to be significantly shifted for the Batwa. Results with  $p < 0.01$  are shown.**

| GO                                            |                                                                  | <i>p</i> | adj. <i>p</i> |
|-----------------------------------------------|------------------------------------------------------------------|----------|---------------|
| <i>Batwa RHG - Biological Processes:</i>      |                                                                  |          |               |
| GO:0003231                                    | cardiac ventricle development                                    | 0.0015   | 0.346         |
| GO:0034284                                    | response to monosaccharide                                       | 0.0043   | 0.346         |
| GO:0008217                                    | regulation of blood pressure                                     | 0.0056   | 0.346         |
| GO:0050864                                    | regulation of B cell activation                                  | 0.0083   | 0.346         |
| GO:0048634                                    | regulation of muscle organ development                           | 0.0090   | 0.346         |
| GO:1901861                                    | regulation of muscle tissue development                          | 0.0092   | 0.346         |
| <i>Andamanese RHG - Biological Processes:</i> |                                                                  |          |               |
| GO:0070646                                    | protein modification by small protein removal                    | 0.0003   | 0.087         |
| GO:0048738                                    | cardiac muscle tissue development                                | 0.0017   | 0.160         |
| GO:0035051                                    | cardiocyte differentiation                                       | 0.0022   | 0.160         |
| GO:0006508                                    | proteolysis                                                      | 0.0024   | 0.156         |
| GO:0071840                                    | cellular component organization or biogenesis                    | 0.0057   | 0.283         |
| GO:0007155                                    | cell adhesion                                                    | 0.0065   | 0.283         |
| GO:0007169                                    | transmembrane receptor protein tyrosine kinase signaling pathway | 0.0091   | 0.298         |
| <i>Andamanese RHG - Molecular Functions:</i>  |                                                                  |          |               |
| GO:0005085                                    | guanyl-nucleotide exchange factor activity                       | 0.0057   | 0.198         |
| GO:0019783                                    | ubiquitin-like protein-specific protease activity                | 0.0081   | 0.198         |

**Table S19. After subsampling to  $\leq 30$  individuals per population, Gene Ontology (GO) biological processes (BP) and molecular functions (MF) with evidence of population-specific distribution shifts in PBS selection index values in the hunter-gatherer populations. No molecular functions were found to be significantly shifted for the Batwa. Results with  $p < 0.01$  are shown.**

| GO                                            |                                               | <i>p</i> | adj. <i>p</i> |
|-----------------------------------------------|-----------------------------------------------|----------|---------------|
| <i>Batwa RHG - Biological Processes:</i>      |                                               |          |               |
| GO:0003231                                    | cardiac ventricle development                 | 0.0012   | 0.329         |
| GO:0016125                                    | sterol metabolic process                      | 0.007    | 0.436         |
| GO:1902652                                    | secondary alcohol metabolic process           | 0.0081   | 0.436         |
| GO:0061351                                    | neural precursor cell proliferation           | 0.0094   | 0.436         |
| <i>Andamanese RHG - Biological Processes:</i> |                                               |          |               |
| GO:0016579                                    | protein deubiquitination                      | 0.002    | 0.342         |
| GO:0032092                                    | positive regulation of protein binding        | 0.0034   | 0.343         |
| GO:0042737                                    | drug catabolic process                        | 0.0041   | 0.343         |
| GO:1901800                                    | positive regulation of proteasomal protein... | 0.0061   | 0.343         |
| GO:0007623                                    | circadian rhythm                              | 0.0092   | 0.343         |
| GO:0035051                                    | cardiocyte differentiation                    | 0.0093   | 0.343         |
| <i>Andamanese RHG - Molecular Functions:</i>  |                                               |          |               |
| GO:0005085                                    | guanyl-nucleotide exchange factor activity    | 0.0038   | 0.289         |

**Table S20. After subsampling Batwa and Bakiga to 10 individuals per population, Gene Ontology (GO) biological processes (BP) and molecular functions (MF) with evidence of population-specific distribution shifts in PBS selection index values in the hunter-gatherer populations. Results with  $p < 0.01$  are shown.**

| GO                                            |                                                    | <i>p</i> | adj. <i>p</i> |
|-----------------------------------------------|----------------------------------------------------|----------|---------------|
| <i>Batwa RHG - Biological Processes:</i>      |                                                    |          |               |
| GO:0030323                                    | respiratory tube development                       | 0.000350 | 0.0931        |
| GO:0030010                                    | establishment of cell polarity                     | 0.00145  | 0.19285       |
| GO:0003231                                    | cardiac ventricle development                      | 0.00267  | 0.214         |
| GO:0060541                                    | respiratory system development                     | 0.00348  | 0.214         |
| GO:2001234                                    | negative regulation of apoptotic signaling pathway | 0.00501  | 0.214         |
| GO:0071772                                    | response to BMP                                    | 0.00502  | 0.214         |
| GO:0051649                                    | establishment of localization in cell              | 0.00602  | 0.214         |
| GO:0007389                                    | pattern specification process                      | 0.0066   | 0.214         |
| GO:0048568                                    | embryonic organ development                        | 0.00724  | 0.214         |
| GO:0051270                                    | regulation of cellular component movement          | 0.00957  | 0.236         |
| <i>Batwa RHG - Molecular Functions:</i>       |                                                    |          |               |
| GO:0008092                                    | cytoskeletal protein binding                       | 0.009    | 0.363         |
| <i>Andamanese RHG - Biological Processes:</i> |                                                    |          |               |
| GO:0016579                                    | protein deubiquitination                           | 0.0019   | 0.338         |
| GO:0032092                                    | positive regulation of protein binding             | 0.0035   | 0.338         |
| GO:0042737                                    | drug catabolic process                             | 0.0044   | 0.338         |
| GO:1901800                                    | positive regulation of proteasomal protein...      | 0.0057   | 0.338         |
| GO:0007623                                    | circadian rhythm                                   | 0.0083   | 0.338         |
| GO:0035051                                    | cardiocyte differentiation                         | 0.0097   | 0.338         |
| <i>Andamanese RHG - Molecular Functions:</i>  |                                                    |          |               |
| GO:0005085                                    | guanyl-nucleotide exchange factor activity         | 0.0035   | 0.266         |

**Table S21. Comparison of results of two methods for computing empirical test for convergence in strong outlier selection in both the Batwa and Andamanese RHGs. In the original method, genes and PBS selection index values are permuted to create an empirical null distribution. In the modified case, genes and their Gene Ontology (GO) annotations are instead permuted to create the null distribution. Biological processes (BP) with empirical test for convergence  $p < 0.005$  in either method shown. No molecular functions were found to be significantly convergently enriched in both RHG populations.**

|            | GO Biological Process                     | Original convergence $p$ | Modified convergence $p$ |
|------------|-------------------------------------------|--------------------------|--------------------------|
| GO:0035107 | appendage morphogenesis                   | 0.000                    | 0.000                    |
| GO:0035108 | limb morphogenesis                        | 0.000                    | 0.000                    |
| GO:0030326 | embryonic limb morphogenesis              | 0.000                    | 0.002                    |
| GO:0035113 | embryonic appendage morphogenesis         | 0.000                    | 0.002                    |
| GO:0048736 | appendage development                     | 0.001                    | 0.003                    |
| GO:0060173 | limb development                          | 0.001                    | 0.003                    |
| GO:0048705 | skeletal system morphogenesis             | 0.002                    | 0.003                    |
| GO:0048522 | positive regulation of cellular process   | 0.006                    | 0.003                    |
| GO:0080135 | regulation of cellular response to stress | 0.018                    | 0.004                    |
| GO:0030048 | actin filament-based movement             | 0.002                    | 0.006                    |
| GO:0007034 | vacuolar transport                        | 0.003                    | -                        |

**Table S22. Comparison of results of two methods for computing empirical test for convergence in PBS selection index shift in both the Batwa and Andamanese RHGs. In the original method, genes and PBS selection index values are permuted to create an empirical null distribution. In the modified case, genes and their Gene Ontology (GO) annotations are instead permuted to create the null distribution. Biological processes (BP) and molecular functions (MF) with empirical test for convergence  $p < 0.005$  in either method shown.**

| GO Biological Process |                                                      | Original convergence $p$ | Modified convergence $p$ |
|-----------------------|------------------------------------------------------|--------------------------|--------------------------|
| GO:0016202            | regulation of striated muscle tissue development     | 0.002                    | 0.000                    |
| GO:1901861            | regulation of muscle tissue development              | 0.002                    | 0.000                    |
| GO:0048738            | cardiac muscle tissue development                    | 0.001                    | 0.001                    |
| GO:0048634            | regulation of muscle organ development               | 0.005                    | 0.001                    |
| GO:0045444            | fat cell differentiation                             | 0.004                    | 0.002                    |
| GO:0003007            | heart morphogenesis                                  | 0.006                    | 0.002                    |
| GO:0035265            | organ growth                                         | 0.001                    | 0.004                    |
| GO:0046434            | organophosphate catabolic process                    | 0.007                    | 0.004                    |
| GO:1903828            | negative regulation of cellular protein localization | 0.001                    | 0.006                    |
| GO Molecular Function |                                                      | Original convergence $p$ | Modified convergence $p$ |
| GO:0019838            | growth factor binding                                | 0.000                    | 0.001                    |
| GO:0019199            | transmembrane receptor protein kinase activity       | 0.000                    | 0.002                    |
| GO:0032559            | adenyl ribonucleotide binding                        | 0.003                    | 0.004                    |
| GO:0030554            | adenyl nucleotide binding                            | 0.004                    | 0.004                    |
| GO:0005524            | ATP binding                                          | 0.005                    | 0.004                    |

- 139 **Additional data table S1 (Bergey\_batwa\_andaman\_convergence.ExtendedData.xlsx)**  
140 Dataset S1a. SNPs with highest PBS values
- 141 **Additional data table S2 (Bergey\_batwa\_andaman\_convergence.ExtendedData.xlsx)**  
142 Dataset S1b. SNPs with convergently low PBS selection index p-values between all pairs of populations
- 143 **Additional data table S3 (Bergey\_batwa\_andaman\_convergence.ExtendedData.xlsx)**  
144 Dataset S1c. Genes that are outliers for PBS selection index
- 145 **Additional data table S4 (Bergey\_batwa\_andaman\_convergence.ExtendedData.xlsx)**  
146 Dataset S1d. Genes with convergently low PBS selection index values between two populations
- 147 **Additional data table S5 (Bergey\_batwa\_andaman\_convergence.ExtendedData.xlsx)**  
148 Dataset S1e. GO categories with evidence of convergent enrichment for strong positive selection (outlier-based test) in the  
149 agriculturalist populations
- 150 **Additional data table S6 (Bergey\_batwa\_andaman\_convergence.ExtendedData.xlsx)**  
151 Dataset S1f. SNPs with highest Bayenv BF values
- 152 **Additional data table S7 (Bergey\_batwa\_andaman\_convergence.ExtendedData.xlsx)**  
153 Dataset S1g. Genes that are outliers for Bayenv BF index value
- 154 **Additional data table S8 (Bergey\_batwa\_andaman\_convergence.ExtendedData.xlsx)**  
155 Dataset S1h. GO categories with convergent evidence of enrichment (outlier-based test) for outlier Bayenv BF index values
- 156 **Additional data table S9 (Bergey\_batwa\_andaman\_convergence.ExtendedData.xlsx)**  
157 Dataset S1i. Results of Fisher overrepresentation test results (outlier-based test) for *a priori* lists of growth associated genes
- 158 **Additional data table S10 (Bergey\_batwa\_andaman\_convergence.ExtendedData.xlsx)**  
159 Dataset S1j. GO categories with population-specific enrichment for strong positive selection (outlier-based test) in the  
160 agriculturalist populations
- 161 **Additional data table S11 (Bergey\_batwa\_andaman\_convergence.ExtendedData.xlsx)**  
162 Dataset S1k. Results of Kolmogorov-Smirnov test results (shift-based test) for *a priori* lists of growth associated genes
- 163 **Additional data table S12 (Bergey\_batwa\_andaman\_convergence.ExtendedData.xlsx)**  
164 Dataset S1l. GO categories with convergent shift in PBS selection index value distributions (shift-based test) in the  
165 agriculturalist populations
- 166 **Additional data table S13 (Bergey\_batwa\_andaman\_convergence.ExtendedData.xlsx)**  
167 Dataset S1m. GO categories with convergent shift in Bayenv BF index value distribution (shift-based test)
- 168 **Additional data table S14 (Bergey\_batwa\_andaman\_convergence.ExtendedData.xlsx)**  
169 Dataset S1n. Genes in cardiac GO categories and associated PBS selection index values for each population
- 170 **Additional data table S15 (Bergey\_batwa\_andaman\_convergence.ExtendedData.xlsx)**  
171 Dataset S1o. GO categories with population-specific shifts in the PBS selection index distribution (shift-based test)

## 172 **References**

- 173 1. Blake JA, et al. (2017) Mouse Genome Database (MGD)-2017: Community knowledge resource for the laboratory mouse.  
174 *Nucleic Acids Research* 45(Database Issue):D723–D729.
- 175 2. Wood AR, et al. (2014) Defining the role of common variation in the genomic and biological architecture of adult human  
176 height. *Nature Genetics* 46(11):1173–1186.
- 177 3. Lui JC, et al. (2012) Synthesizing genome-wide association studies and expression microarray reveals novel genes that act  
178 in the human growth plate to modulate height. *Human Molecular Genetics* 21(23):5193–5201.
- 179 4. Perry GH, et al. (2014) Adaptive, convergent origins of the pygmy phenotype in African rainforest hunter-gatherers.  
180 *Proceedings of the National Academy of Sciences* 111(35):E3596–E3603.
- 181 5. Brown KR, Jurisica I (2005) Online predicted human interaction database. *Bioinformatics* 21(9):2076–2082.
